# Supplementary material for: In silico design of adamantane derived organic superbases with an extended hydrogen bond network and their use as molecular containers for the storage of H2 and CO2
Source: Royal Society of Chemistry journal article supplement (doi:10.1039/c5ra19206d), 2015-01-01
Supplement: c5ra19206d1.pdf [file c5ra19206d1.pdf]

## Electronic Supplementary Information

# In Silico Design of Adamantane Derived Organic Superbases with Extended Hydrogen Bond Network and their Use as Molecular Containers for the Storage of H<sub>2</sub> and CO<sub>2</sub>

Krishnendu Khamaru and Bishwajit Ganguly\*

Computation and Simulation Unit (Analytical Discipline and Centralized Instrument Facility), CSIR-Central Salt & Marine Chemicals Research Institute, Bhavnagar, Gujarat, India-364 002

E-mail: [ganguly@csmcri.org](mailto:ganguly@csmcri.org).

### Table of Contents:

| Sr. No. | Contents                                                                                                                                                                                                                                                                                               | Page No. |
|---------|--------------------------------------------------------------------------------------------------------------------------------------------------------------------------------------------------------------------------------------------------------------------------------------------------------|----------|
| 1       | <b>Scheme S1:</b> Proposed reaction pathways for the synthesis of compound <b>4-6</b> .                                                                                                                                                                                                                | 2        |
| 2       | <b>Table S1:</b> Calculated hydrogen bond energies ( $E_{\text{HB}}$ ) and potential energies densities ( $V(r)$ ) at corresponding bond critical point (BCP) at B3LYP/6-311+G(d,p) level of theory.                                                                                                   | 2        |
| 3       | <b>Table S2:</b> Calculated interaction energies ( $\Delta E$ ) of <b>2</b> with metal ions ( $\text{Li}^+$ , $\text{Na}^+$ ) using M06-2X/6-31+G(d) and M062X/6311+G(d,p)//M06-2X/6-31+G(d) levels of theory in the gas phase. Energies are given in kcal mol <sup>-1</sup> .                         | 3        |
| 4       | <b>Table S3:</b> Calculated interaction energies ( $\Delta E$ ) of <b>2</b> with metal ions ( $\text{Li}^+$ , $\text{Na}^+$ ) using M06-2X/6-31+G(d) and M062X/6311+G(d,p)//M06-2X/6-31+G(d) levels of theory in the gas phase. Energies are given in kcal mol <sup>-1</sup> .                         | 3        |
| 5       | <b>Table S4:</b> Calculated Interaction energy ( $\Delta E$ ) and desorption energy ( $\Delta DE$ ) per carbon dioxide and carbon monoxide molecule using M06-2X/6-31+G(d) and M06-2X/6-311+G(d,p)//M06-2X/6-31+G(d) levels of theory in the gas phase. Energies are given in kcal mol <sup>-1</sup> . | 4        |
| 6       | Gas phase Electronic energies ( $E$ ) with different levels of theory for adamantane-1-amine, zero point vibrational energies (ZPVE), and Cartesian coordinates for <b>1</b> and its monoprotonated cations ( <b>1H<sup>+</sup></b> ) (All energies are given in Hartree).                             | 5-11     |
| 7       | Optimized geometry at B3LYP/6-311+G(d,p) level of theory, gas phase electronic energies ( $E$ ), zero point vibrational energies (ZPVE), and Cartesian                                                                                                                                                 | 11-14    |

|           |                                                                                                                                                                                                                                                                  |              |
|-----------|------------------------------------------------------------------------------------------------------------------------------------------------------------------------------------------------------------------------------------------------------------------|--------------|
|           | coordinates for DMAN and DAN and their corresponding monoprotonated cations (All energies are given in Hartee).                                                                                                                                                  |              |
| <b>8</b>  | Optimized geometry at B3LYP/6-311+G(d,p) level of theory, gas phase electronic energies (E), zero point vibrational energies (ZPVE), and Cartesian coordinates for <b>2-6</b> and their corresponding monoprotonated cations (All energies are given in Hartee). | <b>14-27</b> |
| <b>9</b>  | Optimized geometry at M06-2X/6-31+G(d) level of theory, gas phase electronic energies and Cartesian coordinates for <b>2</b> and its complexes with lithium and sodium ions (All energies are given in Hartee).                                                  | <b>27-32</b> |
| <b>10</b> | M06-2X/6-31+G(d) level of theory optimized, gas phase electronic energies (E) and Cartesian coordinates for hydrogen, carbon dioxide and carbon monoxide trapped lithiated adamantane (9-11) (All energies are given in Hartee).                                 | <b>32-59</b> |
| <b>11</b> | <b>Figure S1:</b> Optimized geometries of hydrogen trapped lithiated adamantane at M06-2X/6-31+G(d) level of theory.                                                                                                                                             | <b>60</b>    |
| <b>12</b> | <b>Figure S2:</b> Optimized geometries of hydrogen trapped lithiated adamantane at M06-2X/6-31+G(d) level of theory.                                                                                                                                             | <b>61</b>    |
| <b>13</b> | <b>Figure S3:</b> Optimized geometries of hydrogen trapped lithiated adamantane at M06-2X/6-31+G(d) level of theory.                                                                                                                                             | <b>61</b>    |

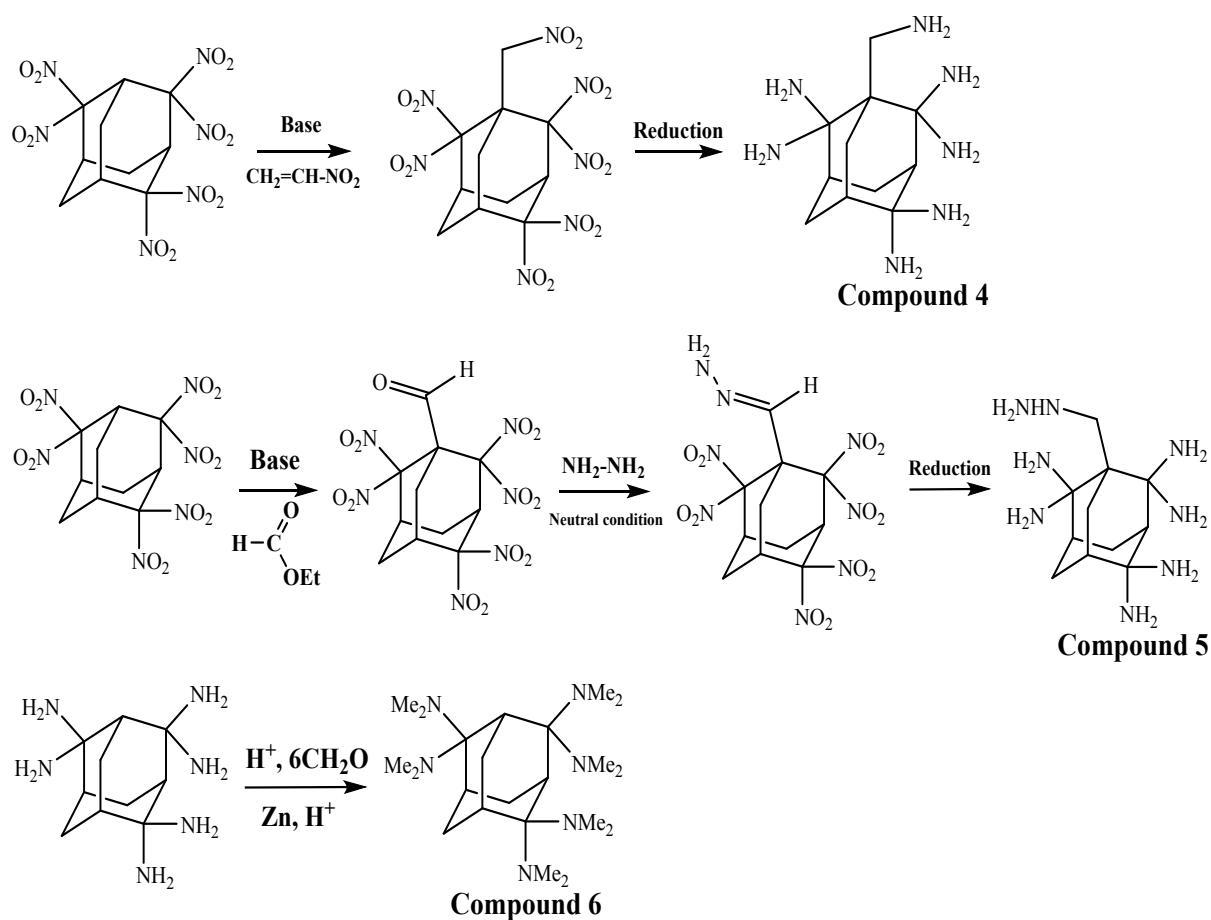

**Scheme S1:** Proposed reaction pathways for the synthesis of compound 4-6.

**Table S1:** Calculated hydrogen bond energies ( $E_{HB}$ ) and potential energies densities ( $V(r)$ ) at corresponding bond critical point (BCP) at B3LYP/6-311+G(d,p) level of theory.

| Compound              | Bond critical point | $V(r)$ at BCP             | $V(r)/2$ | $E_{HB}=(V(r)/2)*627.5095$ (kcal/mol) |
|-----------------------|---------------------|---------------------------|----------|---------------------------------------|
| <b>2H<sup>+</sup></b> | 87                  | -0.0750                   | -0.0375  | -23.5                                 |
| <b>3H<sup>+</sup></b> | 51, 76              | -0.0093, -0.0757          | -0.0425  | -26.7                                 |
| <b>4H<sup>+</sup></b> | 67, 85              | -0.0471, -0.0408          | -0.0439  | -27.6                                 |
| <b>5H<sup>+</sup></b> | 51, 67, 84          | -0.0101, -0.0617, -0.0279 | -0.0498  | -31.3                                 |

**Table S2:** Calculated interaction energies ( $\Delta E$ ) of **2** with metal ions (Li<sup>+</sup>, Na<sup>+</sup>) using M06-2X/6-31+G(d) and M062X/6311+G(d,p)//M06-2X/6-31+G(d) levels of theory in the gas phase. Energies are given in kcal mol<sup>-1</sup>.

| System   | Li <sup>+</sup> |                                       | Na <sup>+</sup> |                                       |
|----------|-----------------|---------------------------------------|-----------------|---------------------------------------|
|          | M06-2X/631+G(d) | M062X/6311+G(d,p)//<br>M062X/631+G(d) | M06-2X/631+G(d) | M062X/6311+G(d,p)//<br>M062X/631+G(d) |
| <b>7</b> | -75.7           | -74.9                                 | -49.3           | -47.6                                 |
| <b>8</b> | -4.2            | -3.2                                  | 12.2            | 13.8                                  |

**Table S3:** Calculated Interaction energy ( $\Delta E$ ) and desorption energy ( $\Delta E_{DE}$ ) per hydrogen molecule using M06-2X/6-31+G(d) and M06-2X/6-311+G(d,p)//M06-2X/6-31+G(d) levels of theory in the gas phase. Energies are given in kcal mol<sup>-1</sup>.

| System                                                            | $\Delta E$      |                                       | $\Delta E_{DE}$ |                                       |
|-------------------------------------------------------------------|-----------------|---------------------------------------|-----------------|---------------------------------------|
|                                                                   | M06-2X/631+G(d) | M062X/6311+G(d,p)//<br>M062X/631+G(d) | M06-2X/631+G(d) | M062X/6311+G(d,p)//<br>M062X/631+G(d) |
| 9.(Li <sup>+</sup> ) <sub>2</sub> -(H <sub>2</sub> )              | -4.2            | -4.6                                  | 4.2             | 4.6                                   |
| 9.(Li <sup>+</sup> ) <sub>2</sub> -(H <sub>2</sub> ) <sub>2</sub> | -4.1            | -4.4                                  | 4.0             | 4.2                                   |
| 9.(Li <sup>+</sup> ) <sub>2</sub> -(H <sub>2</sub> ) <sub>3</sub> | -3.7            | -4.0                                  | 2.9             | 3.1                                   |
| 9.(Li <sup>+</sup> ) <sub>2</sub> -(H <sub>2</sub> ) <sub>4</sub> | -3.5            | -3.8                                  | 3.0             | 3.1                                   |

|                                                                   |      |      |     |     |
|-------------------------------------------------------------------|------|------|-----|-----|
| 9.(Li <sup>+</sup> ) <sub>2</sub> -(H <sub>2</sub> ) <sub>5</sub> | -3.3 | -3.5 | 2.7 | 2.4 |
| 9.(Li <sup>+</sup> ) <sub>2</sub> -(H <sub>2</sub> ) <sub>6</sub> | -3.2 | -3.3 | 2.6 | 2.4 |

**Table S4:** Calculated Interaction energy ( $\Delta E$ ) and desorption energy ( $\Delta E_{DE}$ ) per carbon dioxide and carbon monoxide molecule using M06-2X/6-31+G(d) and M06-2X/6-311+G(d,p)//M06-2X/6-31+G(d) levels of theory in the gas phase. Energies are given in kcal mol<sup>-1</sup>.

| System                                                                          | $\Delta E$      |                                       | $\Delta E_{DE}$ |                                       |
|---------------------------------------------------------------------------------|-----------------|---------------------------------------|-----------------|---------------------------------------|
|                                                                                 | M06-2X/631+G(d) | M062X/6311+G(d,p)//<br>M062X/631+G(d) | M06-2X/631+G(d) | M062X/6311+G(d,p)//<br>M062X/631+G(d) |
| 10.(Li <sup>+</sup> ) <sub>2</sub> <sup>-</sup> (CO <sub>2</sub> )              | -15.6           | -15.6                                 | 15.6            | 15.6                                  |
| 11.(Li <sup>+</sup> ) <sub>2</sub> <sup>-</sup> (CO)                            | -10.5           | -10.0                                 | 10.5            | 10.0                                  |
| 10.(Li <sup>+</sup> ) <sub>2</sub> <sup>-</sup> (CO <sub>2</sub> ) <sub>2</sub> | -15.1           | -15.1                                 | 14.6            | 14.6                                  |
| 11.(Li <sup>+</sup> ) <sub>2</sub> <sup>-</sup> (CO) <sub>2</sub>               | -9.9            | -9.5                                  | 9.3             | 8.9                                   |
| 10.(Li <sup>+</sup> ) <sub>2</sub> <sup>-</sup> (CO <sub>2</sub> ) <sub>3</sub> | -13.4           | -13.4                                 | 10.0            | 10.0                                  |
| 11.(Li <sup>+</sup> ) <sub>2</sub> <sup>-</sup> (CO) <sub>3</sub>               | -9.0            | -8.6                                  | 7.1             | 6.8                                   |
| 10.(Li <sup>+</sup> ) <sub>2</sub> <sup>-</sup> (CO <sub>2</sub> ) <sub>4</sub> | -12.5           | -12.5                                 | 9.9             | 9.9                                   |
| 11.(Li <sup>+</sup> ) <sub>2</sub> <sup>-</sup> (CO) <sub>4</sub>               | -8.4            | -8.0                                  | 6.8             | 6.5                                   |
| 10.(Li <sup>+</sup> ) <sub>2</sub> <sup>-</sup> (CO <sub>2</sub> ) <sub>5</sub> | -11.3           | -11.1                                 | 6.3             | 5.6                                   |
| 11.(Li <sup>+</sup> ) <sub>2</sub> <sup>-</sup> (CO) <sub>5</sub>               | -7.8            | -7.3                                  | 5.4             | 4.6                                   |
| 10.(Li <sup>+</sup> ) <sub>2</sub> <sup>-</sup> (CO <sub>2</sub> ) <sub>6</sub> | -10.5           | -10.3                                 | 6.6             | 5.9                                   |

|                                                         |      |      |     |     |
|---------------------------------------------------------|------|------|-----|-----|
| 11.(Li <sup>+</sup> ) <sub>2</sub><br>(CO) <sub>6</sub> | -7.4 | -6.9 | 5.6 | 4.7 |
|---------------------------------------------------------|------|------|-----|-----|

Electronic energies in gas phase (E) with different levels of theory of adamantane-1-amine, zero point vibrational energies (ZPVE), and Cartesian coordinates for 1 and 1H<sup>+</sup> (All energies are given in Hartree).

**B3LYP/6-31+G(d)**

**1**

**E= -446.08577614, ZPE=0.260229**

```

C      -1.33052700  -1.25432700  0.74404000
H      -0.98447800  -2.15419900  1.27301600
H      -2.42954400  -1.27754900  0.76026100
C      -0.82123300  -1.26671900  -0.71343400
H      -1.18414100  -2.16958100  -1.22342900
C      -0.81644200  0.01211900  1.46098600
H      -1.17273100  0.02069700  2.50045300
C      0.72738800  0.01203500  1.44362000
C      0.72189800  -1.26040000  -0.72366400
H      1.10471900  -1.28150900  -1.75237300
H      1.10591500  -2.16025800  -0.21866800
C      1.26126500  -0.00012500  -0.01314400
C      0.72190900  1.24818400  -0.74442600
C      -1.34011200  -0.01200400  -1.44755700
C      -1.33044700  1.26657800  0.72337200
H      -2.42946300  1.29018100  0.73934500
H      -0.98421500  2.17500500  1.23740500
C      -0.82121100  1.25466600  -0.73414100
H      -1.18410500  2.14896900  -1.25899600
H      1.11391400  -0.86747400  1.98088100
H      1.11394300  0.90029500  1.96629400
H      1.10469200  1.25221300  -1.77333900
H      1.10600100  2.15627300  -0.25443000
H      -1.00329000  -0.02066700  -2.49395400
H      -2.43945300  -0.01218600  -1.46536400
N      2.72880900  -0.00087400  -0.10443200
H      3.11284300  0.82101300  0.36343100
H      3.11279700  -0.81514800  0.37658800

```

**1H<sup>+</sup>**

**E=-446.46055624, ZPE= 0.275554**

|   |             |             |             |
|---|-------------|-------------|-------------|
| C | 1.36502600  | 0.92399200  | 1.12917400  |
| H | 1.02723000  | 1.58574500  | 1.93819300  |
| H | 2.46128300  | 0.93926900  | 1.14756400  |
| C | 0.85891600  | 1.43783500  | -0.23512300 |
| H | 1.20572700  | 2.46349100  | -0.40281400 |
| C | 0.85887400  | -0.51544100 | 1.36275300  |
| H | 1.20554700  | -0.88303100 | 2.33490600  |
| C | -0.69099500 | -0.51658900 | 1.36566100  |
| C | -0.69082500 | 1.44134200  | -0.23557600 |
| H | -1.06723000 | 1.81935700  | -1.19696600 |
| H | -1.06692100 | 2.10568300  | 0.55569700  |
| C | -1.16653500 | 0.00006900  | -0.00004300 |
| C | -0.69108400 | -0.92452300 | -1.13021900 |
| C | 1.36504500  | 0.51603700  | -1.36462500 |
| C | 1.36500000  | -1.44000300 | 0.23547600  |
| H | 2.46125300  | -1.46365800 | 0.23925000  |
| H | 1.02720500  | -2.47147400 | 0.40416700  |
| C | 0.85878300  | -0.92281400 | -1.12759500 |
| H | 1.20547400  | -1.58087500 | -1.93204200 |
| H | -1.06744100 | 0.12709700  | 2.17355600  |
| H | -1.06709600 | -1.53408900 | 1.54456000  |
| H | -1.06733000 | -0.57133600 | -2.10102700 |
| H | -1.06756900 | -1.94597400 | -0.97625900 |
| H | 1.02733800  | 0.88568100  | -2.34230700 |
| H | 2.46129000  | 0.52450900  | -1.38682800 |
| N | -2.71580900 | 0.00002500  | 0.00008600  |
| H | -3.08702900 | -0.94570500 | 0.15361000  |
| H | -3.08700200 | 0.60575600  | 0.74243200  |
| H | -3.08730200 | 0.33995300  | -0.89559100 |

**B3LYP/6-311+G(d,p)**

**1**

**E=-446.19520809, ZPE=0.258751**

|   |             |             |             |
|---|-------------|-------------|-------------|
| C | 1.32959600  | -1.26056900 | -0.73051800 |
| H | 0.98434100  | -2.16279400 | -1.24915600 |
| H | 2.42540800  | -1.28363100 | -0.74597700 |
| C | 0.82002900  | -1.25803200 | 0.72508700  |
| H | 1.18173200  | -2.15298000 | 1.24278500  |
| C | 0.81617600  | -0.00245200 | -1.45882400 |
| H | 1.17198400  | -0.00419100 | -2.49502900 |
| C | -0.72588200 | -0.00233000 | -1.44277000 |
| C | -0.72129600 | -1.25192800 | 0.73487200  |
| H | -1.10343600 | -1.26185800 | 1.76075600  |
| H | -1.10524400 | -2.15319600 | 0.23948000  |
| C | -1.25988000 | 0.00013000  | 0.01264200  |
| C | -0.72106900 | 1.25448500  | 0.73079700  |
| C | 1.33810300  | 0.00231900  | 1.44669000  |

|   |             |             |             |
|---|-------------|-------------|-------------|
| C | 1.32988000  | 1.25793400  | -0.73461900 |
| H | 2.42569100  | 1.28063000  | -0.75004700 |
| H | 0.98490100  | 2.15851900  | -1.25624600 |
| C | 0.82026000  | 1.26038900  | 0.72097700  |
| H | 1.18209700  | 2.15700100  | 1.23569100  |
| H | -1.11130300 | -0.88484800 | -1.96902800 |
| H | -1.11115400 | 0.87855600  | -1.97189200 |
| H | -1.10317300 | 1.26772400  | 1.75664500  |
| H | -1.10508800 | 2.15414800  | 0.23260300  |
| H | 1.00116300  | 0.00411900  | 2.48967000  |
| H | 2.43418200  | 0.00226800  | 1.46494000  |
| N | -2.72630700 | 0.00044900  | 0.10260400  |
| H | -3.11175800 | 0.81564200  | -0.36746600 |
| H | -3.11169800 | -0.81792200 | -0.36196200 |

**1H+**

**E= -446.57066765, ZPE=- 0.27364**

|   |             |             |             |
|---|-------------|-------------|-------------|
| C | -1.36413400 | -0.77607800 | 1.23314400  |
| H | -1.02872600 | -1.33145700 | 2.11561200  |
| H | -2.45736200 | -0.78806300 | 1.25207800  |
| C | -0.85792500 | -1.45377400 | -0.05515500 |
| H | -1.20447400 | -2.48911100 | -0.09455400 |
| C | -0.85789600 | 0.67919100  | 1.28659500  |
| H | -1.20436600 | 1.16279500  | 2.20293900  |
| C | 0.69038700  | 0.68089000  | 1.28957900  |
| C | 0.69022100  | -1.45742900 | -0.05528400 |
| H | 1.06462100  | -1.95036600 | -0.96059500 |
| H | 1.06467900  | -2.01764100 | 0.81000600  |
| C | 1.16616500  | -0.00003100 | 0.00011000  |
| C | 0.69052400  | 0.77676800  | -1.23411000 |
| C | -1.36395700 | -0.68032700 | -1.28855900 |
| C | -1.36371100 | 1.45640700  | 0.05516700  |
| H | -2.45689900 | 1.47964100  | 0.05616400  |
| H | -1.02711000 | 2.49790900  | 0.09487700  |
| C | -0.85775600 | 0.77479700  | -1.23145700 |
| H | -1.20417400 | 1.32652300  | -2.10853000 |
| H | 1.06551200  | 0.14374700  | 2.16895000  |
| H | 1.06470100  | 1.71038300  | 1.34066800  |
| H | 1.06580700  | 0.30803700  | -2.15170700 |
| H | 1.06482100  | 1.80720800  | -1.20686100 |
| H | -1.02843900 | -1.16717100 | -2.21055400 |
| H | -2.45719800 | -0.69082000 | -1.30851300 |
| N | 2.71497600  | -0.00039700 | 0.00001600  |
| H | 3.08096600  | 0.95583700  | 0.03649000  |
| H | 3.08092400  | -0.51025800 | 0.80983000  |
| H | 3.08038000  | -0.44690200 | -0.84659400 |

**B3LYP/6-311+G(2d,p)**

1

**E= -446.20382319, ZPE= 0.258890**

|   |             |             |             |
|---|-------------|-------------|-------------|
| C | -1.32747200 | -1.25439200 | 0.73699300  |
| H | -0.98230700 | -2.15286000 | 1.26005200  |
| H | -2.42227800 | -1.27695700 | 0.75285200  |
| C | -0.81929300 | -1.26018100 | -0.71670200 |
| H | -1.18104700 | -2.15732600 | -1.22860300 |
| C | -0.81433100 | 0.00584900  | 1.45691500  |
| H | -1.16951200 | 0.00998400  | 2.49236000  |
| C | 0.72539300  | 0.00588900  | 1.44016000  |
| C | 0.71977200  | -1.25401900 | -0.72718600 |
| H | 1.10074900  | -1.26989500 | -1.75237200 |
| H | 1.10349400  | -2.15166800 | -0.22737900 |
| C | 1.25809900  | 0.00001700  | -0.01310900 |
| C | 0.71961000  | 1.24819100  | -0.73729400 |
| C | -1.33714700 | -0.00588500 | -1.44396400 |
| C | -1.32759600 | 1.26020900  | 0.72694500  |
| H | -2.42240300 | 1.28280200  | 0.74266500  |
| H | -0.98246900 | 2.16287000  | 1.24276200  |
| C | -0.81944500 | 1.25429100  | -0.72677000 |
| H | -1.18130800 | 2.14724300  | -1.24586900 |
| H | 1.11065800  | -0.87288000 | 1.97060000  |
| H | 1.11054800  | 0.88897600  | 1.96347900  |
| H | 1.10056800  | 1.25577100  | -1.76257200 |
| H | 1.10333500  | 2.14987200  | -0.24481100 |
| H | -1.00118800 | -0.01005800 | -2.48622100 |
| H | -2.43226600 | -0.00604300 | -1.46103800 |
| N | 2.72353700  | -0.00026200 | -0.10355100 |
| H | 3.10759000  | 0.81669300  | 0.36414100  |
| H | 3.10752700  | -0.81451000 | 0.36888600  |

1H<sup>+</sup>

**E= -446.57917367, ZPE= 0.273903**

|   |             |             |             |
|---|-------------|-------------|-------------|
| C | 1.36218400  | 0.52508600  | 1.35688300  |
| H | 1.02585400  | 0.90069400  | 2.32824000  |
| H | 2.45441200  | 0.53379800  | 1.37851200  |
| C | 0.85647400  | 1.43594800  | 0.22349700  |
| H | 1.20336100  | 2.45875600  | 0.38271800  |
| C | 0.85707500  | -0.91172700 | 1.13137300  |
| H | 1.20402100  | -1.56101900 | 1.93751800  |
| C | -0.68832800 | -0.91373000 | 1.13439100  |
| C | -0.68888000 | 1.43913000  | 0.22418200  |
| H | -1.06413100 | 2.09445600  | -0.56981400 |
| H | -1.06429500 | 1.82281100  | 1.17940500  |
| C | -1.16411600 | -0.00004500 | 0.00040400  |
| C | -0.68989600 | -0.52552100 | -1.35789600 |
| C | 1.36097800  | 0.91309100  | -1.13356300 |
| C | 1.36135300  | -1.43813200 | -0.22451000 |



|   |             |             |             |
|---|-------------|-------------|-------------|
| H | 2.45356600  | -1.46194000 | -0.22877900 |
| H | 1.02412500  | -2.46693900 | -0.38434000 |
| C | 0.85557100  | -0.52429500 | -1.35557300 |
| H | 1.20211300  | -0.89768300 | -2.32114600 |
| H | -1.06357500 | -0.55420900 | 2.09902400  |
| H | -1.06392300 | -1.93267000 | 0.98851100  |
| H | -1.06573300 | 0.11021200  | -2.16729100 |
| H | -1.06548600 | -1.54065700 | -1.52823300 |
| H | 1.02398500  | 1.56638800  | -1.94434900 |
| H | 2.45319500  | 0.92792200  | -1.15239800 |
| N | -2.70954500 | 0.00010400  | 0.00077500  |
| H | -3.07525600 | -0.94528800 | -0.14591100 |
| H | -3.07521300 | 0.34607400  | 0.89271900  |
| H | -3.07470200 | 0.59974700  | -0.74493900 |

### M062x/6-311+G(2d,p)

1

E= -446.00878422, ZPE= 0.261017

|   |             |             |             |
|---|-------------|-------------|-------------|
| C | -1.32060900 | -1.24407400 | 0.74571500  |
| H | -0.97129800 | -2.13683100 | 1.27437800  |
| H | -2.41475300 | -1.26324700 | 0.76163400  |
| C | -0.81661300 | -1.26196500 | -0.70411800 |
| H | -1.17912100 | -2.16215900 | -1.20742200 |
| C | -0.80865100 | 0.01746100  | 1.45316600  |
| H | -1.16231700 | 0.02985600  | 2.48764800  |
| C | 0.72500300  | 0.01747700  | 1.43315800  |
| C | 0.71675000  | -1.25464400 | -0.71593900 |
| H | 1.09759000  | -1.27247100 | -1.74102600 |
| H | 1.10245800  | -2.14582000 | -0.20668400 |
| C | 1.25016000  | -0.00012800 | -0.01455000 |
| C | 0.71668500  | 1.23700300  | -0.74601900 |
| C | -1.33368200 | -0.01731600 | -1.43737500 |
| C | -1.32064300 | 1.26162800  | 0.71593700  |
| H | -2.41478600 | 1.28117500  | 0.73151300  |
| H | -0.97128100 | 2.16680600  | 1.22303400  |
| C | -0.81668100 | 1.24459000  | -0.73396300 |
| H | -1.17928700 | 2.13239100  | -1.25871800 |
| H | 1.11167400  | -0.85910500 | 1.96583300  |
| H | 1.11145900  | 0.90684300  | 1.94443600  |
| H | 1.09738300  | 1.22994900  | -1.77128000 |
| H | 1.10253200  | 2.14022800  | -0.25854600 |
| H | -0.99646300 | -0.02981900 | -2.47842300 |
| H | -2.42817100 | -0.01753400 | -1.44818300 |
| N | 2.71024200  | -0.00130200 | -0.10551600 |
| H | 3.08633800  | 0.81886200  | 0.36245400  |

H 3.08604300 -0.81019200 0.38189200

**1H<sup>+</sup>**

**E=-446.38138530, ZPE= 0.276296**

C 1.35362700 -1.34097500 -0.55275600  
H 1.01353100 -2.30187600 -0.94975600  
H 2.44555500 -1.35951500 -0.55979100  
C 0.85014400 -1.14886100 0.88360000  
H 1.19799700 -1.96832200 1.51405900  
C 0.85160000 -0.19121800 -1.43610300  
H 1.20022400 -0.32749800 -2.46068400  
C -0.68694200 -0.19122300 -1.43939500  
C -0.68842600 -1.15035000 0.88477400  
H -1.06419300 -1.02245200 1.90608600  
H -1.06411600 -2.10468300 0.49903200  
C -1.15920200 0.00060400 -0.00042500  
C -0.68681300 1.34243900 0.55372900  
C 1.35352000 0.19054500 1.43780800  
C 1.35444100 1.14932500 -0.88401100  
H 2.44633900 1.16535900 -0.89627500  
H 1.01389000 1.97322400 -1.51797600  
C 0.85171100 1.33932500 0.55297400  
H 1.20013200 2.29474900 0.94750100  
H -1.06267500 -1.13976900 -1.83911100  
H -1.06213500 0.61991800 -2.07342000  
H -1.06268600 1.48565200 1.57297800  
H -1.06219400 2.16337900 -0.06752200  
H 1.01305800 0.32776000 2.46825300  
H 2.44543800 0.19276500 1.45751600  
N -2.68711100 0.00046000 -0.00027100  
H -3.05088200 0.75991000 -0.58380000  
H -3.04965300 -0.88520900 -0.36601200  
H -3.04981600 0.12572300 0.94964400

**wB97X-D/6-311+G(2d,P)**

**1**

**E= -446.08272317, ZPE= 0.261740**

C -1.32014800 -1.25474200 0.72867700  
H -0.97065200 -2.15575100 1.24391500  
H -2.41477800 -1.27659500 0.74681800  
C -0.81802800 -1.25108100 -0.72129300  
H -1.18133900 -2.14416100 -1.23729900  
C -0.80740200 -0.00359800 1.45285400  
H -1.16073100 -0.00613200 2.48807600  
C 0.72639800 -0.00360300 1.43269400

|   |             |             |             |
|---|-------------|-------------|-------------|
| C | 0.71538500  | -1.24457100 | -0.73436800 |
| H | 1.09523400  | -1.25190600 | -1.76022000 |
| H | 1.09990200  | -2.14469500 | -0.23954500 |
| C | 1.25259500  | 0.00006600  | -0.01600400 |
| C | 0.71536900  | 1.24827900  | -0.72817400 |
| C | -1.33503600 | 0.00354700  | -1.43671000 |
| C | -1.32016100 | 1.25108700  | 0.73477000  |
| H | -2.41479400 | 1.27277900  | 0.75300000  |
| H | -0.97073100 | 2.14952900  | 1.25450000  |
| C | -0.81803500 | 1.25465700  | -0.71518800 |
| H | -1.18137700 | 2.15029400  | -1.22672700 |
| H | 1.11294900  | -0.88726800 | 1.95407400  |
| H | 1.11300500  | 0.87736900  | 1.95856200  |
| H | 1.09531500  | 1.26075900  | -1.75393900 |
| H | 1.09984000  | 2.14588600  | -0.22877200 |
| H | -0.99848700 | 0.00609300  | -2.47864000 |
| H | -2.43003300 | 0.00357400  | -1.45022700 |
| N | 2.71120400  | 0.00034800  | -0.10572800 |
| H | 3.09133100  | 0.81313900  | 0.36918100  |
| H | 3.09129700  | -0.81558500 | 0.36378600  |

**1H<sup>+</sup>**

**E= -446.46221863, ZPE= 0.276964**

|   |             |             |             |
|---|-------------|-------------|-------------|
| C | -1.35564700 | 0.06678600  | 1.44770000  |
| H | -1.01731900 | 0.11639200  | 2.48718300  |
| H | -2.44776300 | 0.06743800  | 1.46944900  |
| C | -0.85114100 | -1.21954600 | 0.78127600  |
| H | -1.19979600 | -2.09064400 | 1.33799900  |
| C | -0.85198300 | 1.28597600  | 0.66470700  |
| H | -1.20057000 | 2.20423100  | 1.13958600  |
| C | 0.68641600  | 1.28923300  | 0.66691400  |
| C | 0.68718400  | -1.22165900 | 0.78369500  |
| H | 1.06368400  | -2.14100100 | 0.32092100  |
| H | 1.06227800  | -1.18347200 | 1.81273700  |
| C | 1.16262900  | 0.00013000  | 0.00042500  |
| C | 0.68790100  | -0.06678600 | -1.44937400 |
| C | -1.35362800 | -1.28832700 | -0.66653300 |
| C | -1.35486200 | 1.22048000  | -0.78282500 |
| H | -2.44698200 | 1.23911800  | -0.79475800 |
| H | -1.01606700 | 2.09733100  | -1.34305700 |
| C | -0.85038600 | -0.06715600 | -1.44678600 |
| H | -1.19802500 | -0.11621900 | -2.47969200 |
| H | 1.06073400  | 1.34819800  | 1.69527900  |
| H | 1.06238700  | 2.16257900  | 0.12179600  |
| H | 1.06430900  | -0.97589300 | -1.93201300 |
| H | 1.06374600  | 0.79472100  | -2.01306100 |
| H | -1.01398700 | -2.21218500 | -1.14443500 |

|   |             |             |             |
|---|-------------|-------------|-------------|
| H | -2.44575200 | -1.30839300 | -0.67737200 |
| N | 2.68827200  | 0.00032000  | 0.00040200  |
| H | 3.05111600  | 0.80474800  | -0.51509000 |
| H | 3.05062900  | 0.04457100  | 0.95499200  |
| H | 3.05057100  | -0.84854000 | -0.43847300 |

**Optimized geometry at B3LYP/6-311+G(d,p) level of theory, gas phase electronic energies (E), zero point vibrational energies (ZPVE), and Cartesian coordinates for DMAN and DAN and their corresponding monoprotinated cations (All energies are given in Hartree).**

#### DMAN

**E= -653.97546678, ZPE= 0.291860**

|   |             |             |             |
|---|-------------|-------------|-------------|
| C | -0.38456400 | 2.38875700  | 2.08608500  |
| C | -0.21562800 | 1.20479500  | 2.75232500  |
| C | 0.00000000  | 0.00000000  | 2.03328000  |
| C | 0.00000000  | 0.00000000  | 0.59444600  |
| C | 0.00000000  | 1.29160400  | -0.06623000 |
| C | -0.24172700 | 2.43303300  | 0.68665500  |
| H | 0.24696100  | -1.16439800 | 3.83544700  |
| H | -0.56783900 | 3.30828600  | 2.63115700  |
| H | -0.24696100 | 1.16439800  | 3.83544700  |
| C | 0.21562800  | -1.20479500 | 2.75232500  |
| C | 0.00000000  | -1.29160400 | -0.06623000 |
| H | -0.26092600 | 3.39845200  | 0.19980900  |
| C | 0.24172700  | -2.43303300 | 0.68665500  |
| C | 0.38456400  | -2.38875700 | 2.08608500  |
| H | 0.26092600  | -3.39845200 | 0.19980900  |
| H | 0.56783900  | -3.30828600 | 2.63115700  |
| N | -0.26097500 | -1.39905400 | -1.45077000 |
| N | 0.26097500  | 1.39905400  | -1.45077000 |
| C | -1.57460300 | -0.93431600 | -1.89567700 |
| H | -2.34349700 | -1.71042200 | -1.74354900 |
| H | -1.53808500 | -0.68677500 | -2.96020500 |
| H | -1.87156400 | -0.04342500 | -1.35052300 |
| C | 0.13161800  | -2.62424500 | -2.12516000 |
| H | -0.51144800 | -3.48882900 | -1.88507600 |
| H | 1.16334400  | -2.88118900 | -1.87853500 |
| H | 0.06964100  | -2.46035200 | -3.20430300 |
| C | 1.57460300  | 0.93431600  | -1.89567700 |
| H | 1.53808500  | 0.68677500  | -2.96020500 |
| H | 1.87156400  | 0.04342500  | -1.35052300 |
| H | 2.34349700  | 1.71042200  | -1.74354900 |
| C | -0.13161800 | 2.62424500  | -2.12516000 |
| H | 0.51144800  | 3.48882900  | -1.88507600 |
| H | -1.16334400 | 2.88118900  | -1.87853500 |
| H | -0.06964100 | 2.46035200  | -3.20430300 |

#### DMANH<sup>+</sup>

**E= -654.37933343, ZPE= 0.305605**

|   |             |             |             |
|---|-------------|-------------|-------------|
| C | -2.07465100 | -2.46820900 | -0.00028400 |
| C | -2.76822000 | -1.28561500 | -0.00015700 |
| C | -2.08653200 | -0.04251400 | 0.00003700  |
| C | -0.64812000 | -0.01878800 | 0.00014000  |
| C | 0.04207600  | -1.27426900 | 0.00003800  |
| C | -0.66507200 | -2.45477800 | -0.00020200 |
| H | -3.89755800 | 1.12818800  | 0.00000300  |
| H | -2.60032500 | -3.41513000 | -0.00044800 |
| H | -3.85199100 | -1.28295900 | -0.00023900 |
| C | -2.81467200 | 1.17471200  | 0.00009200  |
| C | -0.03628600 | 1.27190300  | 0.00018800  |
| H | -0.13146900 | -3.39808300 | -0.00029700 |
| C | -0.76696800 | 2.43364700  | 0.00022800  |
| C | -2.17550700 | 2.38822400  | 0.00020500  |
| H | -0.26959800 | 3.39660700  | 0.00021300  |
| H | -2.74025000 | 3.31188000  | 0.00022900  |
| N | 1.44535100  | 1.34666000  | -0.00006900 |
| N | 1.50541000  | -1.28502600 | 0.00019400  |
| H | 1.71567300  | 0.28016300  | 0.00014500  |
| C | 2.07231300  | -1.90219600 | -1.22242100 |
| H | 3.15477600  | -1.75872800 | -1.22524100 |
| H | 1.86584200  | -2.97656600 | -1.27444600 |
| H | 1.64695500  | -1.42638200 | -2.10678600 |
| C | 2.07192100  | -1.90271900 | 1.22278900  |
| H | 1.86599100  | -2.97724000 | 1.27391500  |
| H | 3.15430300  | -1.75866400 | 1.22636500  |
| H | 1.64569700  | -1.42775800 | 2.10717900  |
| C | 2.00385200  | 1.97075900  | -1.24132300 |
| H | 1.73766000  | 3.02606800  | -1.28052600 |
| H | 3.08891100  | 1.86664800  | -1.22758500 |
| H | 1.59063700  | 1.45917900  | -2.10863000 |
| C | 2.00429200  | 1.97116900  | 1.24075300  |
| H | 3.08955400  | 1.86944700  | 1.22536500  |
| H | 1.73583100  | 3.02585100  | 1.28108500  |
| H | 1.59348000  | 1.45809300  | 2.10832700  |

**DAN**

**E= -496.73718561, ZPE= 0.181101**

|   |             |             |             |
|---|-------------|-------------|-------------|
| C | 0.06732600  | 2.42182800  | 1.28629600  |
| C | 0.04522500  | 1.22833700  | 1.96223300  |
| C | 0.00000000  | 0.00000000  | 1.25296500  |
| C | 0.00000000  | 0.00000000  | -0.18569200 |
| C | -0.05701700 | 1.27192900  | -0.85627100 |
| C | 0.00000000  | 2.44222700  | -0.11743200 |
| H | -0.06112900 | -1.20286000 | 3.04582700  |
| H | 0.10907700  | 3.35959300  | 1.82927400  |

|   |             |             |             |
|---|-------------|-------------|-------------|
| H | 0.06112900  | 1.20286000  | 3.04582700  |
| C | -0.04522500 | -1.22833700 | 1.96223300  |
| C | 0.05701700  | -1.27192900 | -0.85627100 |
| H | -0.03398800 | 3.39388200  | -0.63879200 |
| C | 0.00000000  | -2.44222700 | -0.11743200 |
| C | -0.06732600 | -2.42182800 | 1.28629600  |
| H | 0.03398800  | -3.39388200 | -0.63879200 |
| H | -0.10907700 | -3.35959300 | 1.82927400  |
| N | 0.13787800  | -1.35621500 | -2.26015800 |
| H | 0.75879200  | -0.67875200 | -2.68431600 |
| H | 0.34542200  | -2.29200300 | -2.58166500 |
| N | -0.13787800 | 1.35621500  | -2.26015800 |
| H | -0.75879200 | 0.67875200  | -2.68431600 |
| H | -0.34542200 | 2.29200300  | -2.58166500 |

**DANH<sup>+</sup>**

**E= -497.10647603, ZPE= 0.194117**

|   |             |             |             |
|---|-------------|-------------|-------------|
| C | -2.53296900 | -1.11828500 | 0.00000000  |
| C | -1.39714500 | -1.88715500 | 0.00000000  |
| C | -0.11176400 | -1.28843700 | 0.00000000  |
| C | 0.00000000  | 0.14468700  | 0.00000000  |
| C | -1.20570400 | 0.91186800  | 0.00000000  |
| C | -2.43085800 | 0.28846000  | 0.00000000  |
| H | 0.95137400  | -3.16466600 | 0.00000000  |
| H | -3.51157400 | -1.58183600 | 0.00000000  |
| H | -1.46601200 | -2.96866800 | 0.00000000  |
| C | 1.06117300  | -2.08640800 | 0.00000000  |
| C | 1.32334900  | 0.67148800  | 0.00000000  |
| H | -3.33362200 | 0.89010900  | 0.00000000  |
| C | 2.44397000  | -0.11837700 | 0.00000000  |
| C | 2.31223300  | -1.52172000 | 0.00000000  |
| H | 3.43186000  | 0.33080300  | 0.00000000  |
| H | 3.19967400  | -2.14152600 | 0.00000000  |
| N | 1.48903200  | 2.14666400  | 0.00000000  |
| H | 1.99292800  | 2.47444000  | 0.82654300  |
| H | 1.99292800  | 2.47444000  | -0.82654300 |
| N | -1.10925400 | 2.37247900  | 0.00000000  |
| H | -1.57343800 | 2.76633700  | -0.81644100 |
| H | -1.57343800 | 2.76633700  | 0.81644100  |
| H | 0.45717100  | 2.54349800  | 0.00000000  |

**B3LYP/6-311+G(d,p) level of theory optimized, gas phase electronic energies (E), zero point vibrational energies (ZPVE), and Cartesian coordinates for 2-6 and their corresponding monoprotonated cations (All energies are given in Hartree).**

**2**

**E= -723.03303545, ZPE= 0.345529**

|   |             |             |             |
|---|-------------|-------------|-------------|
| C | -0.00002000 | -2.12922000 | -0.00002500 |
| H | -0.58363100 | -2.76673300 | 0.66564800  |
| H | 0.58357900  | -2.76672900 | -0.66571100 |
| C | 0.93236100  | -1.23412700 | 0.83857300  |
| H | 1.58507900  | -1.86347100 | 1.45944800  |
| C | -0.93238900 | -1.23409600 | -0.83860100 |
| H | -1.58512100 | -1.86341700 | -1.45948300 |
| C | -1.82078600 | -0.37600100 | 0.09970500  |
| C | 0.08275300  | -0.32370700 | 1.75479000  |
| H | 0.72302100  | 0.30872400  | 2.37046900  |
| H | -0.50186300 | -0.95107600 | 2.42826300  |
| C | -0.86814500 | 0.56053400  | 0.90791400  |
| H | -1.46053300 | 1.20313200  | 1.57172600  |
| C | 0.00001500  | 1.50271700  | 0.00000300  |
| C | 1.82077900  | -0.37602400 | -0.09970600 |
| C | -0.08276800 | -0.32367600 | -1.75480500 |
| H | 0.50183300  | -0.95104100 | -2.42829400 |
| H | -0.72303000 | 0.30877800  | -2.37046700 |
| C | 0.86815300  | 0.56052800  | -0.90791800 |
| H | 1.46055400  | 1.20312500  | -1.57172000 |
| N | 2.76427700  | 0.40782100  | 0.73221100  |
| H | 3.35966000  | -0.22939400 | 1.25608000  |
| H | 3.37781900  | 0.95506600  | 0.13309000  |
| N | 0.74558300  | 2.41656300  | 0.87650000  |
| H | 1.53794900  | 1.93674400  | 1.29374300  |
| H | 1.12314300  | 3.15715800  | 0.29035800  |
| N | 2.51939800  | -1.25896300 | -1.05540400 |
| H | 3.08748800  | -0.70526800 | -1.69136700 |
| H | 3.14956400  | -1.88392600 | -0.55921900 |
| N | -0.74553100 | 2.41658400  | -0.87648900 |
| H | -1.53787600 | 1.93677000  | -1.29377600 |
| H | -1.12312100 | 3.15715800  | -0.29033900 |
| N | -2.76431100 | 0.40785100  | -0.73217400 |
| H | -3.35971600 | -0.22936000 | -1.25602300 |
| H | -3.37782900 | 0.95509600  | -0.13302800 |
| N | -2.51937200 | -1.25895800 | 1.05541100  |
| H | -3.08744700 | -0.70527400 | 1.69139700  |
| H | -3.14955000 | -1.88391700 | 0.55923500  |

**2H<sup>+</sup>**

**E= -723.43602263, ZPE= 0.358106**

|   |             |             |             |
|---|-------------|-------------|-------------|
| C | -0.09664600 | -2.14826000 | 0.03184300  |
| H | -0.68324400 | -2.74916500 | 0.72634100  |
| H | 0.44968900  | -2.82643200 | -0.62462300 |
| C | 0.88421400  | -1.27293400 | 0.83853600  |
| H | 1.53009600  | -1.91533200 | 1.45148600  |
| C | -1.01144000 | -1.23804400 | -0.80928400 |
| H | -1.69492100 | -1.85874500 | -1.40030600 |
| C | -1.85493700 | -0.32182100 | 0.11931800  |

|   |             |             |             |
|---|-------------|-------------|-------------|
| C | 0.08025900  | -0.31779300 | 1.75124600  |
| H | 0.73646800  | 0.28782700  | 2.38329400  |
| H | -0.52832800 | -0.91915200 | 2.42456700  |
| C | -0.84417700 | 0.59017100  | 0.89901700  |
| H | -1.41145700 | 1.25993400  | 1.56054800  |
| C | 0.03002200  | 1.46915000  | -0.05617600 |
| C | 1.76208600  | -0.47785600 | -0.15590100 |
| C | -0.15091100 | -0.38685000 | -1.76799000 |
| H | 0.40030800  | -1.04651300 | -2.43833900 |
| H | -0.77287600 | 0.25291600  | -2.39273500 |
| C | 0.84607600  | 0.48554500  | -0.96582600 |
| H | 1.44866700  | 1.08742400  | -1.65676500 |
| N | 2.75143200  | 0.40277900  | 0.69397000  |
| H | 3.10667400  | -0.11410600 | 1.49884400  |
| H | 3.54780300  | 0.67114600  | 0.11627800  |
| N | 0.96322700  | 2.29110500  | 0.77502300  |
| H | 1.24662100  | 3.09184100  | 0.21036400  |
| N | 2.49957200  | -1.33487800 | -1.01559500 |
| H | 2.99733400  | -0.89952700 | -1.78102100 |
| H | 3.02917700  | -2.07561700 | -0.57547200 |
| N | -0.66881700 | 2.41341200  | -0.92235900 |
| H | -1.47008700 | 1.95740900  | -1.35769600 |
| H | -1.04904400 | 3.17399400  | -0.36417200 |
| N | -2.75327400 | 0.49487800  | -0.72222900 |
| H | -3.34901400 | -0.11369600 | -1.27855200 |
| H | -3.37577900 | 1.04952100  | -0.13927400 |
| N | -2.56059800 | -1.14770500 | 1.10689400  |
| H | -3.15355400 | -0.57534500 | 1.70186700  |
| H | -3.16439000 | -1.82343200 | 0.64690300  |
| H | 0.48300400  | 2.66410400  | 1.59124000  |
| H | 2.18878800  | 1.29596800  | 0.97860000  |

**2aH<sup>+</sup>**

**E= -723.71665039, ZPE= 0.371884**

|   |             |             |             |
|---|-------------|-------------|-------------|
| C | 0.00019800  | 2.16089200  | -0.00004900 |
| H | 0.55223600  | 2.80392500  | 0.68447500  |
| H | -0.55174700 | 2.80398600  | -0.68459100 |
| C | -0.96123300 | 1.26811500  | 0.81181500  |
| H | -1.62909000 | 1.90386400  | 1.40413400  |
| C | 0.96150300  | 1.26795700  | -0.81188100 |
| H | 1.62947200  | 1.90359400  | -1.40419300 |
| C | 1.80450800  | 0.42615800  | 0.17819400  |
| C | -0.14072400 | 0.36134300  | 1.75895700  |
| H | -0.77741000 | -0.26200500 | 2.38980900  |
| H | 0.42764500  | 0.99440300  | 2.43834400  |
| C | 0.83451900  | -0.53334600 | 0.94717600  |
| H | 1.41475200  | -1.15991900 | 1.63752400  |
| C | -0.00016000 | -1.46113600 | -0.00002100 |
| C | -1.80439700 | 0.42641800  | -0.17821000 |
| C | 0.14085400  | 0.36132100  | -1.75902500 |



|   |             |             |             |
|---|-------------|-------------|-------------|
| H | -0.42738800 | 0.99447700  | -2.43842800 |
| H | 0.77744000  | -0.26214400 | -2.38986100 |
| C | -0.83457500 | -0.53318400 | -0.94726100 |
| H | -1.41492300 | -1.15964300 | -1.63761600 |
| N | -2.52862400 | 1.23593600  | -1.08124000 |
| H | -3.02246700 | 0.77913600  | -1.83733600 |
| H | -3.04466400 | 2.01622700  | -0.69540100 |
| N | -2.80716600 | -0.44592100 | 0.67793700  |
| H | -3.21919500 | 0.10560700  | 1.43391200  |
| H | -3.57484200 | -0.77045100 | 0.08636600  |
| N | -0.89499600 | -2.30116100 | 0.83403700  |
| H | -1.22139200 | -3.10705900 | 0.30297400  |
| H | -0.41575300 | -2.66973000 | 1.65350300  |
| N | 0.89433100  | -2.30159400 | -0.83401500 |
| H | 1.22049400  | -3.10751900 | -0.30285100 |
| H | 0.41488900  | -2.67013500 | -1.65337700 |
| N | 2.80734400  | -0.44621700 | -0.67783000 |
| H | 3.21925700  | 0.10521100  | -1.43394100 |
| H | 3.57509900  | -0.77050800 | -0.08623000 |
| N | 2.52870300  | 1.23562000  | 1.08129100  |
| H | 3.02240400  | 0.77880600  | 1.83747000  |
| H | 3.04481000  | 2.01590100  | 0.69552800  |
| H | -2.27253900 | -1.28471500 | 1.04728100  |
| H | 2.27282200  | -1.28518200 | -1.04693600 |

**3**

**E= -817.70125772, ZPE= 0.390510**

|   |             |             |             |
|---|-------------|-------------|-------------|
| C | -0.06678300 | -0.41058100 | 1.41763300  |
| C | 0.22653200  | 1.08429800  | 1.08379800  |
| H | 0.57545400  | 1.56051400  | 2.00953800  |
| C | -0.59189100 | -1.08164700 | 0.09391900  |
| H | -0.77863200 | -2.14856900 | 0.29341100  |
| C | -1.93518700 | -0.41915300 | -0.40315300 |
| C | -1.10891900 | 1.73992900  | 0.64273100  |
| H | -0.94379600 | 2.79921400  | 0.45131200  |
| H | -1.85153500 | 1.66605500  | 1.43792300  |
| C | -1.61998800 | 1.07917200  | -0.65595800 |
| H | -2.54740200 | 1.57766200  | -0.97225900 |
| C | -0.55073700 | 1.23896000  | -1.75734200 |
| H | -0.89091900 | 0.78476100  | -2.69026600 |
| H | -0.38308700 | 2.30127300  | -1.93235400 |
| C | 1.29567000  | 1.30649100  | -0.03941100 |
| C | 0.42419200  | -0.94207100 | -1.09184600 |
| H | -0.19053300 | -1.18029500 | -1.96168100 |
| C | 0.76679400  | 0.56609200  | -1.30312500 |
| H | 1.52009800  | 0.65719200  | -2.09373200 |
| N | 1.33382300  | 2.76709200  | -0.31414700 |
| H | 1.48069900  | 3.26014400  | 0.56472600  |
| H | 2.18181300  | 2.92726900  | -0.85294400 |
| N | 2.66438600  | 0.89052900  | 0.25372200  |

|   |             |             |             |
|---|-------------|-------------|-------------|
| H | 2.93193100  | 1.13578100  | 1.20178800  |
| H | 2.83721800  | -0.10219200 | 0.09707100  |
| N | 1.14135000  | -1.13104000 | 1.85468300  |
| H | 1.56762300  | -0.60679300 | 2.61528700  |
| H | 0.84668700  | -2.01541300 | 2.26663400  |
| N | -0.99430300 | -0.42992700 | 2.57045000  |
| H | -1.94470600 | -0.22808900 | 2.26795900  |
| H | -1.01383400 | -1.36540600 | 2.96767900  |
| N | -3.00626400 | -0.51143500 | 0.61838800  |
| H | -3.83406400 | -0.03004000 | 0.27504700  |
| H | -3.27131800 | -1.48418300 | 0.75402200  |
| N | -2.34903500 | -1.05453100 | -1.67033900 |
| H | -2.66079000 | -2.00722800 | -1.50167800 |
| H | -3.13357900 | -0.54930100 | -2.07305700 |
| C | 1.52234300  | -2.01823300 | -1.26282700 |
| H | 1.00040400  | -2.98933500 | -1.19755000 |
| H | 1.86340900  | -1.93055700 | -2.30045900 |
| N | 2.72386900  | -1.97474300 | -0.42744200 |
| H | 3.38944000  | -2.68132900 | -0.72001700 |
| H | 2.48050200  | -2.10228400 | 0.54986900  |

**3H<sup>+</sup>**

**E= -818.11817249, ZPE= 0.404612**

|   |             |             |             |
|---|-------------|-------------|-------------|
| C | -0.11212400 | -0.45535700 | 1.40922000  |
| C | 0.17674600  | 1.05228500  | 1.12035600  |
| H | 0.52684400  | 1.51057700  | 2.05398300  |
| C | -0.62183900 | -1.08734300 | 0.06418900  |
| H | -0.81010100 | -2.15769500 | 0.23169900  |
| C | -1.96891000 | -0.41140800 | -0.42221400 |
| C | -1.14710300 | 1.72779300  | 0.68011400  |
| H | -0.98182000 | 2.79309600  | 0.52404700  |
| H | -1.88403800 | 1.63129300  | 1.47583700  |
| C | -1.65440300 | 1.09596900  | -0.63292700 |
| H | -2.57779700 | 1.60335300  | -0.93714200 |
| C | -0.58873500 | 1.28869900  | -1.73076200 |
| H | -0.92011900 | 0.85653700  | -2.67524200 |
| H | -0.42717300 | 2.35492300  | -1.88967400 |
| C | 1.22111100  | 1.29408200  | -0.00444500 |
| C | 0.39332100  | -0.91693700 | -1.11605800 |
| H | -0.22014600 | -1.14476700 | -1.99023800 |
| C | 0.72645300  | 0.59499200  | -1.29634400 |
| H | 1.48116000  | 0.71537500  | -2.08467700 |
| N | 1.39014200  | 2.70233400  | -0.21547200 |
| H | 1.64060500  | 3.24064600  | 0.60451500  |
| H | 1.94554000  | 2.96322100  | -1.02085100 |
| N | 2.60853600  | 0.69551300  | 0.38910200  |
| H | 3.33173000  | 1.29908700  | -0.00179100 |
| H | 2.72121000  | 0.67598400  | 1.40153600  |

|   |             |             |             |
|---|-------------|-------------|-------------|
| N | 1.12259000  | -1.14833100 | 1.83441600  |
| H | 1.29500500  | -0.86515800 | 2.79975800  |
| H | 0.91858700  | -2.14514600 | 1.89891200  |
| N | -1.02628300 | -0.51139600 | 2.55491200  |
| H | -1.98242200 | -0.30709000 | 2.27004900  |
| H | -1.03068200 | -1.44851100 | 2.94723400  |
| N | -3.02857800 | -0.52934200 | 0.59811700  |
| H | -3.85752900 | -0.02778900 | 0.28840700  |
| H | -3.30559100 | -1.50143300 | 0.71174600  |
| N | -2.35773800 | -1.01071300 | -1.70965500 |
| H | -2.69937900 | -1.95859600 | -1.57567500 |
| H | -3.11417300 | -0.48212800 | -2.13547400 |
| C | 1.52870800  | -1.94633200 | -1.31045000 |
| H | 1.09416800  | -2.94793100 | -1.21292600 |
| H | 1.84577300  | -1.85279800 | -2.35239400 |
| N | 2.76360900  | -1.82107800 | -0.49846400 |
| H | 2.66827400  | -2.29173300 | 0.39476500  |
| H | 3.54942300  | -2.23979700 | -0.98735700 |
| H | 2.76734500  | -0.33107400 | 0.02618400  |

4

**E= -857.03713317, ZPE= 0.420319**

|   |             |             |             |
|---|-------------|-------------|-------------|
| C | -1.35446300 | -2.01804900 | -0.55826800 |
| H | -0.87065800 | -2.66998000 | -1.28821200 |
| H | -2.27541900 | -2.49985400 | -0.22590000 |
| C | -1.65863000 | -0.66097100 | -1.21284600 |
| H | -2.28642400 | -0.81141600 | -2.10293500 |
| C | -0.43531300 | -1.77895200 | 0.65095000  |
| H | -0.22891900 | -2.74011300 | 1.14365100  |
| C | 0.92552000  | -1.18445000 | 0.20328800  |
| C | -0.33358700 | -0.00261700 | -1.64085100 |
| H | -0.52623200 | 0.95004300  | -2.13848200 |
| H | 0.15692300  | -0.65538300 | -2.36452800 |
| C | 0.65326700  | 0.23425300  | -0.45092300 |
| C | -0.09553100 | 1.20657600  | 0.57752400  |
| C | -2.41627100 | 0.25143700  | -0.21959600 |
| C | -1.13676400 | -0.84063400 | 1.65366100  |
| H | -2.06001800 | -1.31010200 | 1.99482800  |
| H | -0.51099100 | -0.67031200 | 2.52965000  |
| C | -1.45147600 | 0.51170000  | 0.97625500  |
| H | -1.93617100 | 1.18044100  | 1.69905700  |
| N | -2.76808700 | 1.51242900  | -0.91525800 |
| H | -3.36287500 | 1.30137600  | -1.71337400 |
| H | -3.31268500 | 2.10641100  | -0.29443700 |
| N | -0.25820900 | 2.53316800  | -0.03681000 |

|   |             |             |             |
|---|-------------|-------------|-------------|
| H | -1.01896600 | 2.51293400  | -0.71116600 |
| H | -0.54133600 | 3.17286900  | 0.70146300  |
| N | -3.61044200 | -0.45564900 | 0.28541300  |
| H | -4.10491900 | 0.12665400  | 0.95634700  |
| H | -4.25404500 | -0.64142900 | -0.47963500 |
| N | 0.61286800  | 1.49713000  | 1.83493300  |
| H | 1.13792800  | 0.67727800  | 2.13408400  |
| H | 1.27929900  | 2.24057400  | 1.65333700  |
| N | 1.78880200  | -1.08488300 | 1.40567300  |
| H | 1.75506300  | -1.97280400 | 1.90140500  |
| H | 2.75170800  | -0.95801600 | 1.09517300  |
| N | 1.51628200  | -2.07212800 | -0.82371500 |
| H | 2.50632200  | -1.85853700 | -0.90171400 |
| H | 1.45451400  | -3.03709500 | -0.50784600 |
| C | 1.90269200  | 0.90296700  | -1.09649000 |
| H | 2.16258100  | 0.32683200  | -1.99374900 |
| H | 1.55426700  | 1.87430000  | -1.45030500 |
| C | 3.20773500  | 1.15701200  | -0.32163300 |
| H | 3.70378500  | 2.02286600  | -0.78171500 |
| H | 3.00874400  | 1.42550800  | 0.71548100  |
| N | 4.09519400  | -0.02856700 | -0.30848800 |
| H | 4.40286700  | -0.23864400 | -1.25469300 |
| H | 4.93773600  | 0.16545500  | 0.22554700  |

4H<sup>+</sup>

E= -857.45663816, ZPE= 0.433635

|   |             |             |             |
|---|-------------|-------------|-------------|
| C | 1.44496300  | 1.99842500  | -0.55062900 |
| H | 1.01652400  | 2.66852100  | -1.29710000 |
| H | 2.36403300  | 2.45152200  | -0.17923300 |
| C | 1.72767100  | 0.62953000  | -1.19132600 |
| H | 2.38904700  | 0.76157600  | -2.05635100 |
| C | 0.47444600  | 1.79597600  | 0.62811100  |
| H | 0.27208200  | 2.76388300  | 1.10649600  |
| C | -0.86816800 | 1.23212700  | 0.10055100  |
| C | 0.40396800  | 0.01078700  | -1.67284400 |
| H | 0.58508700  | -0.94734600 | -2.16048300 |
| H | -0.04096600 | 0.67007900  | -2.41897300 |
| C | -0.63511300 | -0.19842200 | -0.52295700 |
| C | 0.04830900  | -1.17549900 | 0.54118200  |
| C | 2.42106800  | -0.31400000 | -0.17702200 |
| C | 1.12383200  | 0.84538300  | 1.65278200  |
| H | 2.06177000  | 1.28645500  | 1.98647400  |
| H | 0.50110400  | 0.72274600  | 2.54177400  |
| C | 1.40567800  | -0.52542200 | 0.99286000  |
| H | 1.86010100  | -1.20292500 | 1.73003200  |

|   |             |             |             |
|---|-------------|-------------|-------------|
| N | 2.71621300  | -1.59390400 | -0.85412700 |
| H | 3.30112000  | -1.42317500 | -1.66893300 |
| H | 3.25388900  | -2.20053100 | -0.23940700 |
| N | 0.14656400  | -2.51208300 | -0.04495100 |
| H | 0.90953800  | -2.53619200 | -0.72163700 |
| H | 0.39327600  | -3.18148900 | 0.67934200  |
| N | 3.61236500  | 0.34804000  | 0.37008000  |
| H | 4.11506000  | -0.26957800 | 1.00170400  |
| H | 4.25706600  | 0.60151600  | -0.37377000 |
| N | -0.77915600 | -1.31538500 | 1.77700800  |
| H | -1.44235000 | -2.07276800 | 1.63403200  |
| H | -0.18680700 | -1.60158300 | 2.55362800  |
| N | -1.83551500 | 1.09562200  | 1.29678600  |
| H | -1.53302000 | 0.25573700  | 1.86070600  |
| H | -1.85974600 | 1.95253600  | 1.84842600  |
| N | -1.43013900 | 2.14379200  | -0.85674900 |
| H | -2.37580800 | 1.93267500  | -1.14367800 |
| H | -1.35509700 | 3.11791200  | -0.58855700 |
| C | -1.88770400 | -0.81318300 | -1.22389700 |
| H | -2.15507800 | -0.15167700 | -2.05680300 |
| H | -1.53357600 | -1.73404100 | -1.68811400 |
| C | -3.18402600 | -1.19273000 | -0.49018000 |
| H | -3.75878600 | -1.83453200 | -1.16632200 |
| H | -2.98630500 | -1.79404000 | 0.39729200  |
| N | -3.99138400 | -0.01965500 | -0.06244600 |
| H | -4.39320300 | 0.43946700  | -0.87732000 |
| H | -4.78757000 | -0.32791500 | 0.49092100  |
| H | -2.79355400 | 0.87035000  | 0.90685900  |

5

**E= -873.04439754, ZPE= 0.408108**

|   |             |             |             |
|---|-------------|-------------|-------------|
| C | -0.24857000 | -1.05719000 | 0.52610100  |
| C | -0.68327200 | 0.03457800  | -0.55585600 |
| C | 1.19252000  | -0.65945800 | 1.02133300  |
| H | 1.48024700  | -1.41015400 | 1.76971600  |
| C | 2.27993300  | -0.62562500 | -0.09681900 |
| C | 0.42348700  | 0.05584400  | -1.65913000 |
| H | 0.12693700  | 0.77951600  | -2.42066900 |
| H | 0.46375200  | -0.92620700 | -2.13247300 |
| C | 1.81746700  | 0.43103200  | -1.12993100 |
| H | 2.52728600  | 0.43803200  | -1.96927400 |
| C | 1.75463100  | 1.82652700  | -0.48917100 |
| H | 2.72575500  | 2.10441400  | -0.07576900 |
| H | 1.48637600  | 2.56064600  | -1.25138400 |
| C | -0.71088100 | 1.49331300  | 0.07689700  |
| C | 1.12965600  | 0.73949900  | 1.67717500  |
| H | 2.11228000  | 1.00167600  | 2.06973800  |
| C | 0.70790700  | 1.79594100  | 0.63858700  |

|   |             |             |             |
|---|-------------|-------------|-------------|
| H | 0.66490200  | 2.77849500  | 1.12910200  |
| N | -0.99106700 | 2.48526100  | -0.99281600 |
| H | -1.99036700 | 2.53754000  | -1.16100400 |
| H | -0.70554700 | 3.40925300  | -0.67851600 |
| N | -1.67501700 | 1.58284600  | 1.18693000  |
| H | -1.76506800 | 2.55286800  | 1.47536200  |
| H | -2.59467800 | 1.24553800  | 0.89827500  |
| N | -1.18821400 | -1.12031500 | 1.65888000  |
| H | -0.86809700 | -1.85269400 | 2.28532200  |
| H | -1.24828100 | -0.22962100 | 2.14076500  |
| N | -0.25700400 | -2.42882400 | 0.02255700  |
| H | 0.39739900  | -2.55322800 | -0.74104700 |
| H | -1.20723900 | -2.64749600 | -0.26512000 |
| N | 2.38855100  | -1.93275500 | -0.77894900 |
| H | 3.14830800  | -1.90066700 | -1.45379500 |
| H | 2.61080300  | -2.66390000 | -0.10829000 |
| N | 3.55950100  | -0.19630100 | 0.50653300  |
| H | 3.87675300  | -0.89282600 | 1.17596200  |
| H | 4.27613300  | -0.13056000 | -0.21213100 |
| H | 0.43476000  | 0.73423400  | 2.51649300  |
| C | -2.00524600 | -0.31118200 | -1.32929000 |
| H | -2.49311900 | 0.62329100  | -1.63648000 |
| H | -1.71326900 | -0.81842600 | -2.25375500 |
| N | -2.97122400 | -1.22266000 | -0.70554800 |
| H | -3.63352000 | -1.48587700 | -1.42775500 |
| N | -3.72881400 | -0.56195200 | 0.35205400  |
| H | -4.69132900 | -0.88263500 | 0.29261200  |
| H | -3.32394400 | -0.94800700 | 1.20725500  |

**5H<sup>+</sup>**

**E= -873.47134525, ZPE= 0.422318**

|   |             |             |             |
|---|-------------|-------------|-------------|
| C | -0.00027800 | -1.15681800 | 0.55057700  |
| C | -0.63547400 | -0.16622300 | -0.53575100 |
| C | 1.36135700  | -0.53786300 | 1.01115700  |
| H | 1.78099300  | -1.21758400 | 1.76267900  |
| C | 2.39954300  | -0.36608000 | -0.14832100 |
| C | 0.41229300  | -0.00251400 | -1.67968500 |
| H | -0.00342000 | 0.65642600  | -2.44387400 |
| H | 0.57917800  | -0.97582300 | -2.14271100 |
| C | 1.74707700  | 0.58374100  | -1.18660400 |
| H | 2.42325700  | 0.68449900  | -2.04422000 |
| C | 1.49417900  | 1.96890600  | -0.56977200 |
| H | 2.42114900  | 2.40169400  | -0.19424500 |
| H | 1.09284400  | 2.63996200  | -1.33094200 |
| C | -0.84759000 | 1.27952300  | 0.06783900  |
| C | 1.10836900  | 0.84920700  | 1.64476000  |
| H | 2.05441300  | 1.26440400  | 1.98750800  |
| C | 0.50574800  | 1.81009300  | 0.59980700  |

|   |             |             |             |
|---|-------------|-------------|-------------|
| H | 0.32629100  | 2.78951000  | 1.06409500  |
| N | -1.39031300 | 2.19092200  | -0.90166300 |
| H | -2.35079200 | 2.01235300  | -1.16367500 |
| H | -1.27396700 | 3.16666500  | -0.65426200 |
| N | -1.80674100 | 1.17766800  | 1.27200200  |
| H | -1.80233000 | 2.03874800  | 1.81737700  |
| H | -2.75950700 | 0.97648900  | 0.90459100  |
| N | -0.89097700 | -1.22657500 | 1.74637800  |
| H | -1.72368300 | -1.75084400 | 1.47981800  |
| H | -0.41501100 | -1.77046400 | 2.46331800  |
| N | 0.20133400  | -2.52053200 | 0.09793900  |
| H | 0.92276500  | -2.59127100 | -0.61568700 |
| H | -0.65657200 | -2.97727300 | -0.18668800 |
| N | 2.68055200  | -1.65769600 | -0.80635000 |
| H | 3.31016400  | -1.51257600 | -1.59176800 |
| H | 3.15734300  | -2.28536400 | -0.16337400 |
| N | 3.59675500  | 0.27658700  | 0.41125400  |
| H | 4.06315100  | -0.34059100 | 1.07064300  |
| H | 4.26726000  | 0.48723500  | -0.32311200 |
| H | 0.47016000  | 0.75114700  | 2.52493000  |
| C | -1.89580300 | -0.75673200 | -1.22389800 |
| H | -2.24320700 | -0.05535000 | -1.99568200 |
| H | -1.56386500 | -1.64420100 | -1.76633100 |
| N | -3.01021300 | -1.20755100 | -0.36927500 |
| H | -3.50008300 | -1.95562700 | -0.85383800 |
| N | -3.93656500 | -0.14109000 | -0.07306100 |
| H | -4.49633700 | 0.10476400  | -0.89300800 |
| H | -4.58288700 | -0.48232800 | 0.63431300  |
| H | -1.50066300 | 0.31183000  | 1.83292000  |

6

**E= -1194.70048125, ZPE= 0.677400**

|   |             |             |             |
|---|-------------|-------------|-------------|
| C | 0.00018900  | 2.38046600  | -0.00003200 |
| H | -0.60214500 | 3.01809000  | -0.64751600 |
| H | 0.60260100  | 3.01800900  | 0.64746000  |
| C | 0.90509300  | 1.49551700  | -0.87130800 |
| H | 1.46517100  | 2.14039000  | -1.55007100 |
| C | -0.90481600 | 1.49561800  | 0.87124300  |
| H | -1.46481100 | 2.14054800  | 1.55002100  |
| C | -1.88573500 | 0.67582500  | -0.02738900 |
| C | 0.01811900  | 0.56444400  | -1.72359400 |
| H | 0.64040200  | -0.09489000 | -2.32339600 |
| H | -0.56284400 | 1.18718200  | -2.40274500 |
| C | -0.93171900 | -0.29341200 | -0.84231500 |
| H | -1.55672000 | -0.90658300 | -1.48788700 |
| C | -0.00007700 | -1.26349100 | -0.00002500 |
| C | 1.88590600  | 0.67561700  | 0.02733200  |
| C | -0.01793600 | 0.56443300  | 1.72351600  |

|   |             |             |             |
|---|-------------|-------------|-------------|
| H | 0.56312800  | 1.18709100  | 2.40265500  |
| H | -0.64028700 | -0.09482900 | 2.32333200  |
| C | 0.93176600  | -0.29354700 | 0.84221800  |
| H | 1.55668200  | -0.90680500 | 1.48778600  |
| N | 2.86980100  | -0.06576900 | -0.79494700 |
| N | 0.77218900  | -2.09302700 | -0.96795100 |
| N | 2.52815400  | 1.62207700  | 1.00258200  |
| N | -0.77258400 | -2.09271300 | 0.96797600  |
| N | -2.86961300 | -0.06553500 | 0.79493400  |
| N | -2.52798700 | 1.62232800  | -1.00259400 |
| C | 1.68880200  | -3.06324600 | -0.39887000 |
| H | 1.21119600  | -4.02978000 | -0.16237700 |
| H | 2.49517300  | -3.26486600 | -1.11342500 |
| H | 2.14784500  | -2.69205300 | 0.51322200  |
| C | 0.17109400  | -2.64467500 | -2.17356100 |
| H | -0.40783800 | -1.90926100 | -2.72910200 |
| H | 0.98344800  | -2.96541200 | -2.83692800 |
| H | -0.46995900 | -3.52678800 | -2.00712700 |
| C | -1.68952600 | -3.06267700 | 0.39899300  |
| H | -1.21224000 | -4.02938800 | 0.16257200  |
| H | -2.49595500 | -3.26397300 | 1.11357500  |
| H | -2.14846200 | -2.69140800 | -0.51312300 |
| C | -0.17166500 | -2.64441700 | 2.17365000  |
| H | 0.40747800  | -1.90911900 | 2.72912500  |
| H | -0.98412300 | -2.96484000 | 2.83704000  |
| H | 0.46912500  | -3.52674100 | 2.00732000  |
| C | -3.97387600 | -0.68704800 | 0.08583300  |
| H | -4.38547600 | -1.49917700 | 0.69503300  |
| H | -4.80320500 | 0.00692400  | -0.13401000 |
| H | -3.64973900 | -1.12248800 | -0.85825100 |
| C | -3.33019200 | 0.46468900  | 2.06905400  |
| H | -4.03693800 | 1.30901300  | 1.98606700  |
| H | -3.85370000 | -0.33718700 | 2.60145700  |
| H | -2.50622900 | 0.77805500  | 2.70669400  |
| C | -3.11714600 | 1.16259400  | -2.25345700 |
| H | -4.16734700 | 0.84295800  | -2.16516800 |
| H | -3.09383600 | 1.98838900  | -2.97662200 |
| H | -2.55757800 | 0.33985100  | -2.69394900 |
| C | -3.34016100 | 2.68638800  | -0.43393500 |
| H | -3.47036900 | 3.47510100  | -1.18440100 |
| H | -4.34817400 | 2.35997700  | -0.12846300 |
| H | -2.85929900 | 3.14142600  | 0.43147100  |
| C | 3.11722300  | 1.16228800  | 2.25346600  |
| H | 4.16740200  | 0.84256800  | 2.16521600  |
| H | 3.09394700  | 1.98807800  | 2.97663500  |
| H | 2.55757300  | 0.33958600  | 2.69392800  |
| C | 3.34041200  | 2.68610300  | 0.43398100  |
| H | 3.47064500  | 3.47478300  | 1.18447600  |
| H | 4.34841300  | 2.35964000  | 0.12852700  |
| H | 2.85960000  | 3.14119600  | -0.43142400 |
| C | 3.97405600  | -0.68726100 | -0.08581600 |



|   |            |             |             |
|---|------------|-------------|-------------|
| H | 4.38565000 | -1.49941800 | -0.69498200 |
| H | 4.80339400 | 0.00670800  | 0.13400100  |
| H | 3.64991200 | -1.12266000 | 0.85828500  |
| C | 3.33040000 | 0.46439600  | -2.06908300 |
| H | 4.03717200 | 1.30870100  | -1.98612200 |
| H | 3.85388200 | -0.33751400 | -2.60146200 |
| H | 2.50644700 | 0.77776800  | -2.70673000 |

**6H<sup>+</sup>**

**E= -1195.13321918, ZPE= 0.692996**

|   |             |             |             |
|---|-------------|-------------|-------------|
| C | -0.05526300 | -2.40084600 | -0.04370400 |
| H | -0.65555600 | -3.03686700 | 0.60463500  |
| H | 0.52423100  | -3.04726400 | -0.70506100 |
| C | 0.87512100  | -1.54346500 | 0.83195700  |
| H | 1.44264800  | -2.20247200 | 1.48950900  |
| C | -0.95650300 | -1.48665000 | -0.88736100 |
| H | -1.54393900 | -2.11222500 | -1.55820300 |
| C | -1.90554900 | -0.64850600 | 0.03522000  |
| C | 0.01311900  | -0.61150800 | 1.70769000  |
| H | 0.63470600  | -0.00634800 | 2.36705700  |
| H | -0.59082600 | -1.24258100 | 2.35491000  |
| C | -0.90924600 | 0.29541000  | 0.85216200  |
| H | -1.50146800 | 0.92043400  | 1.51621300  |
| C | 0.01934600  | 1.24040000  | -0.01720400 |
| C | 1.82434100  | -0.74090000 | -0.09681300 |
| C | -0.06521600 | -0.57792400 | -1.75501300 |
| H | 0.50165600  | -1.20286500 | -2.44602600 |
| H | -0.67636900 | 0.09421300  | -2.35028800 |
| C | 0.90495700  | 0.26527600  | -0.88663200 |
| H | 1.53661100  | 0.86725200  | -1.53568000 |
| N | 2.82043400  | 0.14093100  | 0.85335300  |
| N | 0.96073900  | 2.03245500  | 0.94842700  |
| N | 2.58558000  | -1.57247800 | -0.96782800 |
| N | -0.71395100 | 2.13577200  | -0.88753000 |
| N | -2.86683900 | 0.13571200  | -0.77286500 |
| N | -2.53917600 | -1.58800100 | 1.01284600  |
| C | 1.63566600  | 3.14705700  | 0.25271400  |
| H | 0.96145000  | 3.98606300  | 0.05817400  |
| H | 2.45244400  | 3.51355100  | 0.88037300  |
| H | 2.05579200  | 2.82649000  | -0.69852600 |
| C | 0.37849400  | 2.58145000  | 2.19236600  |
| H | -0.08973300 | 1.81224400  | 2.80075600  |
| H | 1.19011200  | 3.01575700  | 2.78223900  |
| H | -0.35187000 | 3.37473200  | 2.00579700  |
| C | -1.70921900 | 3.03688500  | -0.33254200 |
| H | -1.31953600 | 4.05798400  | -0.19269900 |
| H | -2.56370600 | 3.10568700  | -1.01270100 |
| H | -2.08315100 | 2.68995300  | 0.62530000  |

|   |             |             |             |
|---|-------------|-------------|-------------|
| C | -0.26461000 | 2.61986500  | -2.18490900 |
| H | 0.44306800  | 1.95516500  | -2.67315300 |
| H | -1.13288600 | 2.69867600  | -2.85002600 |
| H | 0.19461600  | 3.61941300  | -2.13809600 |
| C | -3.97563000 | 0.72897900  | -0.03113900 |
| H | -4.41660700 | 1.53287000  | -0.62692700 |
| H | -4.77982100 | 0.01408200  | 0.19673700  |
| H | -3.64371400 | 1.16594500  | 0.90965700  |
| C | -3.36883100 | -0.40869000 | -2.03510700 |
| H | -4.03018300 | -1.28153000 | -1.92461100 |
| H | -3.95211800 | 0.37439600  | -2.52726400 |
| H | -2.56659600 | -0.67638400 | -2.72052800 |
| C | -3.11377500 | -1.12571100 | 2.27570100  |
| H | -4.16288900 | -0.80928800 | 2.19995100  |
| H | -3.07881100 | -1.95154800 | 2.99605000  |
| H | -2.55309500 | -0.30046300 | 2.71156200  |
| C | -3.36996300 | -2.65288300 | 0.45803500  |
| H | -3.49276500 | -3.43415200 | 1.21525000  |
| H | -4.37777100 | -2.32012800 | 0.16875400  |
| H | -2.90748000 | -3.11796600 | -0.41165900 |
| C | 3.10421000  | -1.17169100 | -2.27349800 |
| H | 4.19397300  | -1.03618300 | -2.26105600 |
| H | 2.88467200  | -1.95409400 | -3.00868400 |
| H | 2.65817900  | -0.25073200 | -2.63782100 |
| C | 3.21361200  | -2.80907500 | -0.51106700 |
| H | 3.10013000  | -3.58157300 | -1.27910600 |
| H | 4.29254500  | -2.68769100 | -0.33485900 |
| H | 2.76099400  | -3.18987100 | 0.40044600  |
| C | 3.97046900  | 0.69876700  | 0.09194700  |
| H | 4.47020600  | 1.44791500  | 0.70687400  |
| H | 4.67568000  | -0.09518600 | -0.14677500 |
| H | 3.63047000  | 1.16620000  | -0.82702000 |
| C | 3.34271100  | -0.53380600 | 2.07498800  |
| H | 3.92557000  | -1.41247500 | 1.80230700  |
| H | 3.99092100  | 0.16702300  | 2.60314400  |
| H | 2.53201000  | -0.82212000 | 2.73616500  |
| H | 2.16125400  | 0.96061700  | 1.12334600  |

**6aH<sup>+</sup>**

**E= -1195.45879441, ZPE= 0.708747**

|   |             |             |             |
|---|-------------|-------------|-------------|
| C | -0.00008800 | -2.42454100 | -0.00004900 |
| H | 0.57796100  | -3.07007000 | -0.66067900 |
| H | -0.57818000 | -3.07005500 | 0.66056100  |
| C | -0.92552100 | -1.53651500 | -0.85038500 |
| H | -1.51519300 | -2.17680600 | -1.50461000 |
| C | 0.92539900  | -1.53659800 | 0.85031900  |
| H | 1.51502200  | -2.17694200 | 1.50453600  |
| C | 1.84759300  | -0.72467100 | -0.10448300 |

|   |             |             |             |
|---|-------------|-------------|-------------|
| C | -0.05501100 | -0.62077600 | -1.73524900 |
| H | -0.66323500 | 0.00657500  | -2.38428100 |
| H | 0.53091900  | -1.25485400 | -2.39847300 |
| C | 0.89112400  | 0.26915200  | -0.88717100 |
| H | 1.49284000  | 0.88215200  | -1.55339700 |
| C | 0.00004300  | 1.23000000  | -0.00001700 |
| C | -1.84765100 | -0.72457000 | 0.10446500  |
| C | 0.05495000  | -0.62081100 | 1.73520000  |
| H | -0.53103300 | -1.25486000 | 2.39840700  |
| H | 0.66321800  | 0.00648100  | 2.38424900  |
| C | -0.89111200 | 0.26920400  | 0.88713400  |
| H | -1.49278200 | 0.88223900  | 1.55336800  |
| N | -2.86126100 | 0.17391400  | -0.83438800 |
| N | -0.89128700 | 2.06056900  | -0.89335700 |
| N | -2.58906200 | -1.54899700 | 0.98655800  |
| N | 0.89146000  | 2.06049200  | 0.89330700  |
| N | 2.86115300  | 0.17378400  | 0.83445300  |
| N | 2.58904500  | -1.54908800 | -0.98655200 |
| C | -1.64588100 | 3.13097300  | -0.20574900 |
| H | -1.04493200 | 4.02494500  | -0.01807200 |
| H | -2.48020200 | 3.43536200  | -0.84250600 |
| H | -2.05412800 | 2.78924300  | 0.74256900  |
| C | -0.38391700 | 2.60530900  | -2.17427000 |
| H | 0.15722000  | 1.86411800  | -2.75607300 |
| H | -1.24727400 | 2.91267500  | -2.76946000 |
| H | 0.25232100  | 3.48537400  | -2.05020100 |
| C | 1.64590900  | 3.13101700  | 0.20572500  |
| H | 1.04489400  | 4.02498800  | 0.01825100  |
| H | 2.48031100  | 3.43536100  | 0.84239700  |
| H | 2.05402800  | 2.78942600  | -0.74269800 |
| C | 0.38426100  | 2.60504000  | 2.17436900  |
| H | -0.15675900 | 1.86374900  | 2.75615500  |
| H | 1.24769600  | 2.91235800  | 2.76947000  |
| H | -0.25203000 | 3.48509700  | 2.05051600  |
| C | 4.00350700  | 0.73223000  | 0.05124200  |
| H | 4.50817800  | 1.48624500  | 0.65501700  |
| H | 4.70641100  | -0.06373000 | -0.18304700 |
| H | 3.65319700  | 1.18823500  | -0.86939300 |
| C | 3.40778000  | -0.49758600 | 2.05517700  |
| H | 3.96720000  | -1.38695700 | 1.77280500  |
| H | 4.08240300  | 0.19864100  | 2.55417700  |
| H | 2.61222700  | -0.76359000 | 2.74380100  |
| C | 3.10704300  | -1.13331900 | -2.29499500 |
| H | 4.19408500  | -0.99458500 | -2.28091500 |
| H | 2.89132200  | -1.91351500 | -3.03193600 |
| H | 2.65932300  | -0.21088800 | -2.65504400 |
| C | 3.25751800  | -2.77272400 | -0.53084600 |
| H | 3.17552300  | -3.53728200 | -1.30867800 |
| H | 4.32829400  | -2.61544000 | -0.34639800 |
| H | 2.81123400  | -3.17919600 | 0.37283600  |
| C | -3.10697100 | -1.13325700 | 2.29504600  |

|   |             |             |             |
|---|-------------|-------------|-------------|
| H | -4.19401100 | -0.99450100 | 2.28103800  |
| H | -2.89121900 | -1.91348000 | 3.03195000  |
| H | -2.65921000 | -0.21084600 | 2.65509700  |
| C | -3.25757600 | -2.77261400 | 0.53086300  |
| H | -3.17554500 | -3.53719100 | 1.30867300  |
| H | -4.32836100 | -2.61531300 | 0.34648100  |
| H | -2.81134900 | -3.17907000 | -0.37285300 |
| C | -4.00374700 | 0.73206700  | -0.05116000 |
| H | -4.50847400 | 1.48612300  | -0.65483500 |
| H | -4.70656200 | -0.06403000 | 0.18293400  |
| H | -3.65356600 | 1.18795200  | 0.86958300  |
| C | -3.40771900 | -0.49732000 | -2.05526400 |
| H | -3.96703900 | -1.38681600 | -1.77308100 |
| H | -4.08240300 | 0.19890200  | -2.55418600 |
| H | -2.61208600 | -0.76309900 | -2.74388200 |
| H | -2.22513100 | 0.96714500  | -1.11522200 |
| H | 2.22492900  | 0.96687000  | 1.11547800  |

**Optimized geometry at M06-2X/6-31+G(d) level of theory, gas phase electronic energies and Cartesian coordinates for 2 and its complexes with lithium and sodium ions (All energies are given in Hartree).**

**2**

**E= -722.54107451**

|   |             |             |             |
|---|-------------|-------------|-------------|
| C | 0.00004400  | -2.12308300 | 0.00017200  |
| H | -0.58948700 | -2.75965400 | 0.66552000  |
| H | 0.58960400  | -2.75974200 | -0.66506900 |
| C | 0.92540000  | -1.22858600 | 0.83899400  |
| H | 1.58327700  | -1.85643500 | 1.46089300  |
| C | -0.92534500 | -1.22876000 | -0.83881100 |
| H | -1.58317900 | -1.85673300 | -1.46063000 |
| C | -1.80706800 | -0.37409300 | 0.09691300  |
| C | 0.07896700  | -0.31934100 | 1.75176500  |
| H | 0.72358000  | 0.31316300  | 2.36834500  |
| H | -0.51040100 | -0.94745900 | 2.42432400  |
| C | -0.86519200 | 0.56081100  | 0.90217500  |
| H | -1.46511200 | 1.20747500  | 1.56167100  |
| C | -0.00001900 | 1.49373900  | -0.00004100 |
| C | 1.80706200  | -0.37406600 | -0.09692600 |
| C | -0.07895600 | -0.31960200 | -1.75170600 |
| H | 0.51046900  | -0.94779800 | -2.42414400 |
| H | -0.72358200 | 0.31275700  | -2.36841800 |
| C | 0.86513500  | 0.56073800  | -0.90222800 |
| H | 1.46501600  | 1.20735000  | -1.56181000 |
| N | 2.74515900  | 0.40614500  | 0.72882100  |
| H | 3.37165500  | -0.23566100 | 1.21514300  |
| H | 3.33258400  | 0.98086500  | 0.12348100  |
| N | 0.73656000  | 2.40660100  | 0.87622600  |
| H | 1.51006800  | 1.92083000  | 1.32466100  |

|   |             |             |             |
|---|-------------|-------------|-------------|
| H | 1.14636500  | 3.12563200  | 0.27948900  |
| N | 2.49466500  | -1.25655600 | -1.05064000 |
| H | 3.07611500  | -0.69892600 | -1.67620700 |
| H | 3.12069000  | -1.88657700 | -0.54905300 |
| N | -0.73655400 | 2.40668700  | -0.87626100 |
| H | -1.51022000 | 1.92103600  | -1.32455300 |
| H | -1.14617000 | 3.12580200  | -0.27949600 |
| N | -2.74501700 | 0.40604600  | -0.72906800 |
| H | -3.37151800 | -0.23579500 | -1.21533800 |
| H | -3.33244900 | 0.98093600  | -0.12389800 |
| N | -2.49485100 | -1.25641900 | 1.05065300  |
| H | -3.07635200 | -0.69867200 | 1.67607100  |
| H | -3.12085200 | -1.88646200 | 0.54906300  |

## 7. (Li<sup>+</sup>)

**E= -729.94285139**

|   |             |             |             |
|---|-------------|-------------|-------------|
| C | -0.15123000 | -2.14824800 | 0.14457500  |
| H | -0.73697600 | -2.69598000 | 0.88703000  |
| H | 0.36974600  | -2.87174500 | -0.48594400 |
| C | 0.86309900  | -1.24468900 | 0.86783800  |
| H | 1.50896300  | -1.85765700 | 1.51432300  |
| C | -1.06170800 | -1.27025200 | -0.72723400 |
| H | -1.76691500 | -1.90882300 | -1.27849700 |
| C | -1.87410500 | -0.30671600 | 0.16676500  |
| C | 0.08174300  | -0.23665400 | 1.73300900  |
| H | 0.74567500  | 0.37864500  | 2.36061000  |
| H | -0.53153700 | -0.79450900 | 2.44363700  |
| C | -0.84370200 | 0.64232300  | 0.85952900  |
| H | -1.39584800 | 1.35265700  | 1.49880700  |
| C | 0.00537300  | 1.44690100  | -0.16745700 |
| C | 1.73900900  | -0.52859500 | -0.18262800 |
| C | -0.21175600 | -0.47913000 | -1.74089000 |
| H | 0.32339000  | -1.18335200 | -2.37928000 |
| H | -0.84428600 | 0.12846800  | -2.39104000 |
| C | 0.81644200  | 0.41582300  | -1.00350800 |
| H | 1.41325500  | 0.97431100  | -1.74078200 |
| N | 2.82815300  | 0.23319800  | 0.52775300  |
| H | 3.45590700  | -0.46874600 | 0.92767600  |
| H | 3.39409600  | 0.68964800  | -0.19333600 |
| N | 0.88626400  | 2.38634400  | 0.59112800  |
| H | 1.33048000  | 2.96757600  | -0.12717300 |
| N | 2.30613500  | -1.50749400 | -1.08903800 |
| H | 2.88285800  | -1.08014100 | -1.81135000 |
| H | 2.86185000  | -2.20900800 | -0.60354900 |
| N | -0.71370500 | 2.30549000  | -1.10229200 |
| H | -1.48439800 | 1.79160300  | -1.52792600 |
| H | -1.16089100 | 3.06851900  | -0.59238800 |
| N | -2.79147700 | 0.45603400  | -0.68813500 |
| H | -3.43404600 | -0.18792300 | -1.14972200 |

|    |             |             |             |
|----|-------------|-------------|-------------|
| H  | -3.36939300 | 1.07723800  | -0.12102500 |
| N  | -2.54689900 | -1.07062900 | 1.21832500  |
| H  | -3.18730900 | -0.47088500 | 1.73755800  |
| H  | -3.11147800 | -1.81444300 | 0.80831800  |
| H  | 0.26350100  | 3.03837100  | 1.07737000  |
| Li | 2.17168900  | 1.57033700  | 1.74750100  |

## 7. (Na<sup>+</sup>)

**E=-884.66417907**

|    |             |             |             |
|----|-------------|-------------|-------------|
| C  | 0.80761600  | 2.03576300  | 0.62201400  |
| H  | 1.35623900  | 2.22851900  | 1.54727700  |
| H  | 0.60043600  | 2.99202100  | 0.13774500  |
| C  | -0.50571400 | 1.30653200  | 0.95580000  |
| H  | -1.10385400 | 1.91762300  | 1.64893100  |
| C  | 1.63655300  | 1.15120800  | -0.32189100 |
| H  | 2.55978300  | 1.67955400  | -0.60111300 |
| C  | 2.02444700  | -0.16207700 | 0.39400000  |
| C  | -0.15322000 | -0.03261200 | 1.63071900  |
| H  | -1.05088200 | -0.56881000 | 1.95749100  |
| H  | 0.41899200  | 0.17647300  | 2.53700200  |
| C  | 0.69395000  | -0.92274400 | 0.69222400  |
| H  | 0.93820700  | -1.87328200 | 1.19801200  |
| C  | -0.11774500 | -1.23819500 | -0.59882000 |
| C  | -1.31001900 | 1.09326500  | -0.34450900 |
| C  | 0.83215700  | 0.84376300  | -1.60099600 |
| H  | 0.60657300  | 1.78142400  | -2.10976100 |
| H  | 1.41925900  | 0.23505700  | -2.29107000 |
| C  | -0.49516700 | 0.12492000  | -1.24603900 |
| H  | -1.05526800 | -0.08574800 | -2.17034300 |
| N  | -2.67063600 | 0.55011700  | -0.01506500 |
| H  | -3.19596900 | 1.34176300  | 0.36462000  |
| H  | -3.13193300 | 0.36170700  | -0.90997900 |
| N  | -1.31004300 | -2.05348500 | -0.22259000 |
| H  | -1.73679000 | -2.30490400 | -1.12019700 |
| N  | -1.42971800 | 2.36377900  | -1.04428200 |
| H  | -1.96789400 | 2.27570800  | -1.90453100 |
| H  | -1.86934800 | 3.07704500  | -0.46491800 |
| N  | 0.55269400  | -2.03252900 | -1.62748300 |
| H  | 1.48713500  | -1.66518700 | -1.80324100 |
| H  | 0.70698800  | -2.98040300 | -1.28169200 |
| N  | 2.88608200  | -0.94067600 | -0.50564300 |
| H  | 3.73111100  | -0.40568300 | -0.70673800 |
| H  | 3.19402400  | -1.79776900 | -0.04524600 |
| N  | 2.65312000  | 0.14955800  | 1.67899500  |
| H  | 3.01082300  | -0.70181100 | 2.11141100  |
| H  | 3.45573800  | 0.76267100  | 1.53704200  |
| H  | -0.93564100 | -2.94582500 | 0.11441000  |
| Na | -2.97139800 | -1.35967600 | 1.21021400  |

**8. (Li<sup>+</sup>)<sub>2</sub>****E= -737.23066914**

|    |             |             |             |
|----|-------------|-------------|-------------|
| C  | 0.00014900  | -2.18412800 | 0.00015200  |
| H  | -0.51923800 | -2.82465900 | 0.71461300  |
| H  | 0.51968600  | -2.82462900 | -0.71424100 |
| C  | 1.00130300  | -1.28889900 | 0.75167100  |
| H  | 1.69478400  | -1.91905500 | 1.32560700  |
| C  | -1.00117800 | -1.28917300 | -0.75148300 |
| H  | -1.69457900 | -1.91954600 | -1.32529200 |
| C  | -1.80837300 | -0.46112800 | 0.27362200  |
| C  | 0.21987600  | -0.38400200 | 1.72687000  |
| H  | 0.87722900  | 0.22506600  | 2.36000000  |
| H  | -0.32737500 | -1.01985200 | 2.42373900  |
| C  | -0.79774800 | 0.50846700  | 0.97014400  |
| H  | -1.34408100 | 1.13828400  | 1.69251900  |
| C  | -0.00007200 | 1.42262800  | -0.00014700 |
| C  | 1.80838700  | -0.46105900 | -0.27361300 |
| C  | -0.21978000 | -0.38448400 | -1.72688300 |
| H  | 0.32761900  | -1.02049300 | -2.42348600 |
| H  | -0.87714900 | 0.22426200  | -2.36029200 |
| C  | 0.79769900  | 0.50832400  | -0.97028500 |
| H  | 1.34399800  | 1.13805700  | -1.69275100 |
| N  | 2.89875900  | 0.28464200  | 0.44019000  |
| H  | 3.56593600  | -0.42687100 | 0.75370900  |
| H  | 3.42814200  | 0.80700800  | -0.26494900 |
| N  | 0.88440300  | 2.30241700  | 0.81779000  |
| H  | 1.36403300  | 2.95084100  | 0.18620300  |
| N  | 2.34992400  | -1.33453500 | -1.29112200 |
| H  | 2.95876000  | -0.85102800 | -1.94912600 |
| H  | 2.86528500  | -2.12151500 | -0.90015600 |
| N  | -0.88449000 | 2.30231800  | -0.81800300 |
| H  | -1.36409600 | 2.95093400  | -0.18664700 |
| H  | -0.28904400 | 2.90030300  | -1.39802200 |
| N  | -2.89878800 | 0.28434100  | -0.44018000 |
| H  | -3.56605800 | -0.42716500 | -0.75347700 |
| H  | -3.42804500 | 0.80710400  | 0.26474100  |
| N  | -2.34995200 | -1.33436200 | 1.29138400  |
| H  | -2.95907400 | -0.85068500 | 1.94902000  |
| H  | -2.86519700 | -2.12147700 | 0.90050300  |
| H  | 0.28875300  | 2.90072500  | 1.39730100  |
| Li | 2.34751300  | 1.47206200  | 1.85960000  |
| Li | -2.34780000 | 1.47172700  | -1.85967100 |

**8. (Na<sup>+</sup>)<sub>2</sub>****E= -1046.68916680**

|   |             |             |             |
|---|-------------|-------------|-------------|
| C | -0.00029000 | -2.36970800 | -0.00007900 |
|---|-------------|-------------|-------------|

|    |             |             |             |
|----|-------------|-------------|-------------|
| H  | 0.25080700  | -3.01021900 | -0.84728500 |
| H  | -0.25155400 | -3.01020100 | 0.84709700  |
| C  | -1.19365400 | -1.47324000 | -0.37579500 |
| H  | -2.04006800 | -2.10177800 | -0.68694400 |
| C  | 1.19328200  | -1.47355100 | 0.37573800  |
| H  | 2.03957900  | -2.10231000 | 0.68676200  |
| C  | 1.61745600  | -0.64176400 | -0.85544600 |
| C  | -0.77889900 | -0.56953300 | -1.55354100 |
| H  | -1.60759500 | 0.05255500  | -1.89791300 |
| H  | -0.49960700 | -1.20087500 | -2.39721200 |
| C  | 0.43165100  | 0.32286300  | -1.17714500 |
| H  | 0.70441000  | 0.95266500  | -2.04125600 |
| C  | 0.00013800  | 1.23846000  | 0.00025500  |
| C  | -1.61772400 | -0.64152200 | 0.85545000  |
| C  | 0.77864100  | -0.57005900 | 1.55370800  |
| H  | 0.49901900  | -1.20166200 | 2.39708000  |
| H  | 1.60738100  | 0.05168800  | 1.89861100  |
| C  | -0.43168700 | 0.32272200  | 1.17743500  |
| H  | -0.70434500 | 0.95240400  | 2.04165900  |
| N  | -2.88854400 | 0.09231000  | 0.55504300  |
| H  | -3.61828400 | -0.62639500 | 0.56245700  |
| H  | -3.11229100 | 0.65593400  | 1.38083900  |
| N  | -1.10600700 | 2.11711900  | -0.47561800 |
| H  | -1.41274400 | 2.68368600  | 0.32022800  |
| N  | -1.78284100 | -1.52194700 | 1.99822100  |
| H  | -2.16044600 | -1.03844300 | 2.81150700  |
| H  | -2.39207100 | -2.31229000 | 1.79252500  |
| N  | 1.10668500  | 2.11650000  | 0.47636700  |
| H  | 1.41373800  | 2.68304500  | -0.31938200 |
| H  | 0.69722200  | 2.79219600  | 1.12716100  |
| N  | 2.88848500  | 0.09166800  | -0.55519700 |
| H  | 3.61804800  | -0.62721700 | -0.56250000 |
| H  | 3.11237600  | 0.65514300  | -1.38105500 |
| N  | 1.78215000  | -1.52209000 | -1.99839100 |
| H  | 2.15992800  | -1.03857700 | -2.81159600 |
| H  | 2.39115500  | -2.31264800 | -1.79283600 |
| H  | -0.69621900 | 2.79272500  | -1.12630500 |
| Na | 3.23487000  | 1.44649200  | 1.29913900  |
| Na | -3.23409100 | 1.44693200  | -1.29987700 |

Li<sup>+</sup>

**E= -7.28104871**

|    |            |            |            |
|----|------------|------------|------------|
| Li | 0.00000000 | 0.00000000 | 0.00000000 |
|----|------------|------------|------------|

Na<sup>+</sup>

**E= -162.04450829**



Na 0.00000000 0.00000000 0.00000000

**M06-2X/6-31+G(d) level of theory optimized, gas phase electronic energies (E) and Cartesian coordinates for hydrogen, carbon dioxide and carbon monoxide trapped lithium adamantane (9-11) (All energies are given in Hartree).**

**9. (Li<sup>+</sup>)<sub>2</sub> - (H<sub>2</sub>)**

**E=-738.40086308**

|    |             |             |             |
|----|-------------|-------------|-------------|
| C  | -0.19992000 | -2.18557000 | 0.25506100  |
| H  | -0.68094500 | -2.68257600 | 1.09943300  |
| H  | 0.19466300  | -2.95497400 | -0.41060300 |
| C  | 0.93347700  | -1.28233900 | 0.77142600  |
| H  | 1.64349400  | -1.88495500 | 1.35480300  |
| C  | -1.21483500 | -1.32056100 | -0.51304000 |
| H  | -2.00503800 | -1.96448100 | -0.92346000 |
| C  | -1.85236300 | -0.29937700 | 0.45490500  |
| C  | 0.31864200  | -0.20415600 | 1.68799000  |
| H  | 1.07384900  | 0.42683300  | 2.17297600  |
| H  | -0.19626800 | -0.70317300 | 2.50970200  |
| C  | -0.71000700 | 0.66393600  | 0.91679200  |
| H  | -1.13348900 | 1.42318000  | 1.59561300  |
| C  | 0.04092900  | 1.37877300  | -0.23989200 |
| C  | 1.67612500  | -0.65980300 | -0.43262000 |
| C  | -0.48559600 | -0.61727400 | -1.67629000 |
| H  | -0.05563200 | -1.37979200 | -2.32630300 |
| H  | -1.16659500 | -0.05043500 | -2.32358300 |
| C  | 0.66123300  | 0.28661200  | -1.15366700 |
| H  | 1.16552800  | 0.77204900  | -2.00610500 |
| N  | 2.88284500  | 0.08039500  | 0.06388500  |
| H  | 3.53210000  | -0.63663400 | 0.40104500  |
| H  | 3.36632200  | 0.47006600  | -0.75124000 |
| N  | 1.07035000  | 2.27479600  | 0.35928000  |
| H  | 1.53476900  | 2.78299100  | -0.39908700 |
| N  | 2.04791300  | -1.70027800 | -1.36710400 |
| H  | 2.62157300  | -1.35770200 | -2.13592700 |
| H  | 2.54417400  | -2.46914100 | -0.91942100 |
| N  | -0.86155300 | 2.22142400  | -1.07591500 |
| H  | -1.23287000 | 2.97422800  | -0.48873700 |
| H  | -0.28850200 | 2.70120200  | -1.77626300 |
| N  | -2.95373600 | 0.43085800  | -0.25893900 |
| H  | -3.69168600 | -0.26177400 | -0.41767500 |
| H  | -3.38022100 | 1.07851100  | 0.41085700  |
| N  | -2.35053800 | -0.98081300 | 1.62911200  |
| H  | -2.85396400 | -0.36349300 | 2.26403300  |
| H  | -2.95890900 | -1.76493800 | 1.39949100  |
| H  | 0.58788800  | 2.99917900  | 0.89879100  |
| Li | 2.56966300  | 1.46496100  | 1.37314300  |

|    |             |            |             |
|----|-------------|------------|-------------|
| H  | 3.35132200  | 1.97188800 | 3.29683500  |
| H  | 3.85257200  | 1.46608200 | 3.08917200  |
| Li | -2.46207000 | 1.38895300 | -1.86999900 |

### 9.(Li<sup>+</sup>)<sub>2</sub>-(H<sub>2</sub>)<sub>2</sub>

**E=-739.57081325**

|    |             |             |             |
|----|-------------|-------------|-------------|
| C  | -0.07133200 | -2.22346300 | 0.24768900  |
| H  | 0.27322400  | -2.96227700 | -0.47765600 |
| H  | -0.46027400 | -2.75697800 | 1.11680100  |
| C  | -1.16971700 | -1.35420500 | -0.39073800 |
| H  | -1.98584500 | -1.99942900 | -0.74473500 |
| C  | 1.09034100  | -1.31485200 | 0.68675300  |
| H  | 1.86154000  | -1.92161100 | 1.18138100  |
| C  | 1.70824400  | -0.63868400 | -0.55711000 |
| C  | -0.56319000 | -0.60361200 | -1.59382300 |
| H  | -1.30987300 | -0.03031600 | -2.15648000 |
| H  | -0.18348700 | -1.33886100 | -2.30406500 |
| C  | 0.61220100  | 0.30629000  | -1.15146600 |
| H  | 1.02571200  | 0.82644500  | -2.03199300 |
| C  | 0.05615300  | 1.35845900  | -0.15373900 |
| C  | -1.72790100 | -0.37864200 | 0.66862000  |
| C  | 0.54932600  | -0.27592600 | 1.68973900  |
| H  | 0.12499600  | -0.80756300 | 2.54232400  |
| H  | 1.33826000  | 0.35539200  | 2.11782800  |
| C  | -0.56377000 | 0.59396400  | 1.04916100  |
| H  | -0.93320700 | 1.32357800  | 1.78928000  |
| N  | -2.90428300 | 0.35079100  | 0.08915500  |
| H  | -3.64565000 | -0.34884000 | -0.01174800 |
| H  | -3.26971400 | 0.97822800  | 0.81210300  |
| N  | -0.94343000 | 2.19644800  | -0.87516400 |
| H  | -1.28063200 | 2.91872800  | -0.23195800 |
| N  | -2.09579800 | -1.10960800 | 1.86161800  |
| H  | -2.55971600 | -0.52757100 | 2.55689100  |
| H  | -2.69747000 | -1.90724500 | 1.66289600  |
| N  | 1.11668300  | 2.26359000  | 0.37021600  |
| H  | 1.49721700  | 2.80145100  | -0.41394900 |
| H  | 0.67130500  | 2.96255100  | 0.97169000  |
| N  | 2.93930700  | 0.11376700  | -0.14403200 |
| H  | 3.62867700  | -0.59810000 | 0.11615500  |
| H  | 3.34314500  | 0.53505400  | -0.98627300 |
| N  | 2.01472600  | -1.64019400 | -1.55526600 |
| H  | 2.50860000  | -1.26070400 | -2.36122300 |
| H  | 2.56544700  | -2.41060800 | -1.17974800 |
| H  | -0.45274200 | 2.71407900  | -1.61007600 |
| Li | -2.59460100 | 1.34315000  | -1.54744700 |
| H  | -3.66502300 | 1.18929300  | -3.39141900 |
| H  | -4.08893500 | 0.76178000  | -2.95820800 |
| Li | 2.71524500  | 1.46395300  | 1.22319800  |

|   |            |            |            |
|---|------------|------------|------------|
| H | 3.12965000 | 2.68478700 | 2.92549300 |
| H | 3.79030200 | 2.35788300 | 2.84322000 |

**9.(Li<sup>+</sup>)<sub>2</sub>-(H<sub>2</sub>)<sub>3</sub>**

**E=-740.73896144**

|    |             |             |             |
|----|-------------|-------------|-------------|
| C  | 0.24787300  | -2.26405700 | 0.11110500  |
| H  | 0.63872000  | -2.91148400 | -0.67612800 |
| H  | -0.04221200 | -2.89344100 | 0.95430100  |
| C  | -0.96456100 | -1.48278100 | -0.42480700 |
| H  | -1.72059300 | -2.18950700 | -0.79447100 |
| C  | 1.32007500  | -1.26120000 | 0.57158400  |
| H  | 2.17409100  | -1.80795200 | 0.99511700  |
| C  | 1.80552400  | -0.43761400 | -0.64200100 |
| C  | -0.49849100 | -0.59145300 | -1.59367400 |
| H  | -1.32911500 | -0.06646200 | -2.07803800 |
| H  | -0.07463200 | -1.22999100 | -2.36959100 |
| C  | 0.58802200  | 0.41263300  | -1.13142700 |
| H  | 0.90354900  | 1.03276000  | -1.98742800 |
| C  | -0.03759100 | 1.32869700  | -0.04418100 |
| C  | -1.57979000 | -0.64578000 | 0.71962200  |
| C  | 0.71267500  | -0.35712100 | 1.66312400  |
| H  | 0.38621900  | -0.98660000 | 2.49174300  |
| H  | 1.44798800  | 0.32744500  | 2.10443400  |
| C  | -0.51425100 | 0.42385400  | 1.12490500  |
| H  | -0.92831200 | 1.05794700  | 1.92709300  |
| N  | -2.85340800 | -0.01584100 | 0.23808200  |
| H  | -3.51859000 | -0.78563300 | 0.11830600  |
| H  | -3.24873200 | 0.51769400  | 1.01853900  |
| N  | -1.15469500 | 2.09095800  | -0.66980700 |
| H  | -1.54693900 | 2.72463900  | 0.03287700  |
| N  | -1.81390800 | -1.49113400 | 1.87054000  |
| H  | -2.30475500 | -1.01084000 | 2.62283000  |
| H  | -2.33816900 | -2.33284700 | 1.63713900  |
| N  | 0.93744400  | 2.31296700  | 0.50351600  |
| H  | 1.22125700  | 2.94079900  | -0.25424700 |
| H  | 0.44273800  | 2.91609000  | 1.16694900  |
| N  | 2.96146700  | 0.42296600  | -0.22040400 |
| H  | 3.73830200  | -0.21962500 | -0.03884000 |
| H  | 3.27570800  | 0.94501500  | -1.04425700 |
| N  | 2.17996700  | -1.32800300 | -1.71876900 |
| H  | 2.58811000  | -0.83948500 | -2.51401200 |
| H  | 2.83434800  | -2.04923300 | -1.41992800 |
| H  | -0.75750100 | 2.70906700  | -1.38297000 |
| Li | -2.75175600 | 1.12335900  | -1.33581200 |
| H  | -3.57673500 | 0.57427200  | -3.27677000 |
| H  | -3.99940300 | 0.14843800  | -2.84118500 |
| Li | 2.64681900  | 1.65103100  | 1.24554500  |
| H  | 2.98102000  | 2.66159800  | 3.10298200  |

|   |             |            |             |
|---|-------------|------------|-------------|
| H | 3.64193200  | 2.76272500 | 2.78216700  |
| H | -4.31506600 | 2.74013000 | -1.33073100 |
| H | -4.53339600 | 2.24684300 | -0.82268900 |

**9.(Li<sup>+</sup>)<sub>2</sub>-(H<sub>2</sub>)<sub>4</sub>**

**E=-741.90726387**

|    |             |             |             |
|----|-------------|-------------|-------------|
| C  | -0.04474500 | -2.31499200 | 0.14716900  |
| H  | 0.26169100  | -3.01458200 | -0.63237300 |
| H  | -0.38026600 | -2.89454300 | 1.00909600  |
| C  | -1.18122200 | -1.42504500 | -0.38599100 |
| H  | -2.01367500 | -2.05818500 | -0.72358200 |
| C  | 1.13539300  | -1.42003500 | 0.56404600  |
| H  | 1.93654300  | -2.04391800 | 0.98435700  |
| C  | 1.67761700  | -0.67918300 | -0.67824600 |
| C  | -0.65046800 | -0.61112200 | -1.58329000 |
| H  | -1.43273600 | -0.01120500 | -2.06234800 |
| H  | -0.31314400 | -1.30550900 | -2.35365700 |
| C  | 0.54555400  | 0.28274400  | -1.16492700 |
| H  | 0.90635500  | 0.84743500  | -2.04135800 |
| C  | 0.04016500  | 1.28271700  | -0.08933300 |
| C  | -1.68255200 | -0.50470500 | 0.74885400  |
| C  | 0.65013600  | -0.43116300 | 1.64269600  |
| H  | 0.28263200  | -1.00232800 | 2.49611900  |
| H  | 1.46397400  | 0.18646000  | 2.03984800  |
| C  | -0.50356800 | 0.45646600  | 1.10856800  |
| H  | -0.83373800 | 1.14662600  | 1.90342300  |
| N  | -2.89403400 | 0.24358600  | 0.27671400  |
| H  | -3.63617300 | -0.45594700 | 0.18064500  |
| H  | -3.21926500 | 0.82571500  | 1.05473100  |
| N  | -1.00323300 | 2.14421600  | -0.71301900 |
| H  | -1.30611000 | 2.83578500  | -0.02086900 |
| N  | -1.97799700 | -1.29455300 | 1.92451700  |
| H  | -2.39675800 | -0.74848700 | 2.67545800  |
| H  | -2.59260000 | -2.08162000 | 1.72326900  |
| N  | 1.12252400  | 2.17373000  | 0.41481700  |
| H  | 1.44754000  | 2.75255800  | -0.36514400 |
| H  | 0.70712700  | 2.83769000  | 1.07452800  |
| N  | 2.92502000  | 0.06427500  | -0.30083400 |
| H  | 3.63046600  | -0.65245900 | -0.10570100 |
| H  | 3.28032300  | 0.52096000  | -1.14658700 |
| N  | 1.93170800  | -1.62875800 | -1.74032600 |
| H  | 2.37281100  | -1.20591300 | -2.55519000 |
| H  | 2.50999700  | -2.41017900 | -1.43596500 |
| H  | -0.55872400 | 2.69576900  | -1.45257300 |
| Li | -2.70970900 | 1.34191600  | -1.31810500 |
| H  | -3.70222100 | 0.99408500  | -3.19701700 |
| H  | -4.12399400 | 0.56906200  | -2.75954600 |
| Li | 2.80128400  | 1.38874600  | 1.11448500  |
| H  | -4.08624300 | 3.14715200  | -1.31269000 |

|   |             |            |             |
|---|-------------|------------|-------------|
| H | -4.18852100 | 2.82191800 | -0.65495300 |
| H | 3.66953700  | 1.66919900 | 3.08532400  |
| H | 3.01102200  | 1.99939200 | 3.16988100  |
| H | 4.51501100  | 2.87973400 | 0.53069800  |
| H | 3.86864600  | 3.23178000 | 0.61268800  |

**9.(Li<sup>+</sup>)<sub>2</sub>-(H<sub>2</sub>)<sub>5</sub>**

**E=-743.07518786**

|    |             |             |             |
|----|-------------|-------------|-------------|
| C  | -0.14804900 | -2.31152000 | 0.25498400  |
| H  | 0.08361900  | -3.06356200 | -0.50167100 |
| H  | -0.43655900 | -2.83065600 | 1.17076500  |
| C  | -1.29719300 | -1.42108300 | -0.24941400 |
| H  | -2.16687800 | -2.04776400 | -0.49184300 |
| C  | 1.07989100  | -1.42747900 | 0.53565200  |
| H  | 1.89501300  | -2.04823900 | 0.93396400  |
| C  | 1.55088100  | -0.77047300 | -0.78110300 |
| C  | -0.83273500 | -0.69219400 | -1.52566000 |
| H  | -1.63337700 | -0.09971900 | -1.98360900 |
| H  | -0.56672800 | -1.43799500 | -2.27597200 |
| C  | 0.40966400  | 0.18998700  | -1.24480100 |
| H  | 0.72126200  | 0.69315400  | -2.17588700 |
| C  | 0.01314800  | 1.26396200  | -0.19475900 |
| C  | -1.69631200 | -0.42065100 | 0.85909100  |
| C  | 0.69103100  | -0.36968100 | 1.58860700  |
| H  | 0.36446500  | -0.88429000 | 2.49312700  |
| H  | 1.54284400  | 0.24518400  | 1.90321800  |
| C  | -0.47013400 | 0.52305400  | 1.08205500  |
| H  | -0.72471900 | 1.26685200  | 1.85624200  |
| N  | -2.91628200 | 0.33547100  | 0.42237400  |
| H  | -3.67942300 | -0.34767600 | 0.40714000  |
| H  | -3.17886500 | 0.96664900  | 1.18551200  |
| N  | -1.04712900 | 2.12380500  | -0.79004600 |
| H  | -1.28816800 | 2.85295900  | -0.11231300 |
| N  | -1.93378500 | -1.13441900 | 2.09528200  |
| H  | -2.29246100 | -0.53623900 | 2.83744700  |
| H  | -2.57802800 | -1.91467900 | 1.97778400  |
| N  | 1.15663200  | 2.13763400  | 0.18414000  |
| H  | 1.46096000  | 2.64889900  | -0.64931000 |
| H  | 0.80786600  | 2.85968800  | 0.82079600  |
| N  | 2.83113700  | -0.03469000 | -0.52928200 |
| H  | 3.54353900  | -0.75280600 | -0.36921800 |
| H  | 3.12268800  | 0.39728600  | -1.41145300 |
| N  | 1.71100900  | -1.78418300 | -1.80192700 |
| H  | 2.11467800  | -1.41760300 | -2.66227500 |
| H  | 2.28729900  | -2.56407400 | -1.48991000 |
| H  | -0.63929400 | 2.63071100  | -1.58083200 |
| Li | -2.80267900 | 1.33381100  | -1.24584600 |
| Li | 2.83750400  | 1.32224600  | 0.88664400  |

|   |             |            |             |
|---|-------------|------------|-------------|
| H | 4.11801300  | 0.05877000 | 2.24746600  |
| H | 4.62577800  | 0.56248700 | 2.05439300  |
| H | 2.77295000  | 2.39861300 | 2.97902900  |
| H | 2.98266700  | 2.91674700 | 2.49352000  |
| H | 4.14663700  | 2.97125100 | 0.20479500  |
| H | 4.66674000  | 2.44346600 | 0.20192300  |
| H | -4.08562300 | 3.19537200 | -1.06004800 |
| H | -3.98360800 | 3.10993000 | -1.78900900 |
| H | -4.00311400 | 0.33892800 | -2.82314600 |
| H | -4.51687300 | 0.53131900 | -2.32473100 |

### 9. (Li<sup>+</sup>)<sub>2</sub>-(H<sub>2</sub>)<sub>6</sub>

**E=-744.24302807**

|   |             |             |             |
|---|-------------|-------------|-------------|
| C | 0.01962500  | -2.34728000 | 0.05318800  |
| H | -0.19316900 | -2.96746700 | 0.92581600  |
| H | 0.24156000  | -3.00775000 | -0.78694600 |
| C | 1.22167400  | -1.43498600 | 0.35595600  |
| H | 2.08508200  | -2.05061400 | 0.64499800  |
| C | -1.19484000 | -1.46886000 | -0.29583200 |
| H | -2.04938600 | -2.11069400 | -0.55267500 |
| C | -1.57161800 | -0.60315500 | 0.92759700  |
| C | 0.84921800  | -0.50863800 | 1.53091900  |
| H | 1.69037400  | 0.11073800  | 1.86350900  |
| H | 0.59612000  | -1.12646800 | 2.39338000  |
| C | -0.37625000 | 0.37220900  | 1.18017100  |
| H | -0.61870700 | 1.02338000  | 2.03717800  |
| C | -0.00431500 | 1.25753200  | -0.04051600 |
| C | 1.58687700  | -0.62897700 | -0.91101200 |
| C | -0.83575500 | -0.59864300 | -1.51697600 |
| H | -0.57627800 | -1.25590400 | -2.34779400 |
| H | -1.68603000 | -0.00728200 | -1.87829600 |
| C | 0.37856400  | 0.31529600  | -1.21413800 |
| H | 0.61279400  | 0.92391400  | -2.10394200 |
| N | 2.84745100  | 0.14061800  | -0.65347200 |
| H | 3.59600400  | -0.55650100 | -0.60148300 |
| H | 3.07106900  | 0.66646600  | -1.50375400 |
| N | 1.12017200  | 2.14646300  | 0.35839100  |
| H | 1.35927600  | 2.74321000  | -0.43868600 |
| N | 1.73355500  | -1.52913900 | -2.03500800 |
| H | 2.07229900  | -1.06185200 | -2.87428200 |
| H | 2.35828200  | -2.30799000 | -1.83284100 |
| N | -1.13894000 | 2.11232800  | -0.48436100 |
| H | -1.37923100 | 2.75052700  | 0.27958100  |
| H | -0.80373100 | 2.72078800  | -1.23647400 |
| N | -2.84084300 | 0.13486600  | 0.63080400  |
| H | -3.58137300 | -0.57258800 | 0.61259300  |
| H | -3.07276900 | 0.70078000  | 1.45272300  |
| N | -1.70661000 | -1.44639300 | 2.09681800  |

|    |             |             |             |
|----|-------------|-------------|-------------|
| H  | -2.05298400 | -0.94080700 | 2.91045500  |
| H  | -2.32183200 | -2.24196800 | 1.93430600  |
| H  | 0.77700700  | 2.79319100  | 1.07392400  |
| Li | 2.86123500  | 1.33538500  | 0.89763900  |
| Li | -2.87699000 | 1.26132100  | -0.96981500 |
| H  | -4.27921500 | -0.15795900 | -2.08879700 |
| H  | -4.78371600 | 0.34728200  | -1.89168600 |
| H  | -2.90183700 | 1.87561200  | -3.19394700 |
| H  | -3.00321400 | 2.53418100  | -2.87100500 |
| H  | -4.12030600 | 3.03916100  | -0.57041300 |
| H  | -4.61822900 | 2.52975100  | -0.36631200 |
| H  | 4.45465200  | 2.76328300  | 0.25222200  |
| H  | 4.36137000  | 2.89912100  | 0.97491500  |
| H  | 4.14332400  | 0.20042700  | 2.34601300  |
| H  | 4.65890000  | 0.23368500  | 1.81531200  |
| H  | 2.68176700  | 2.01191100  | 3.17639500  |
| H  | 2.78681200  | 2.67012400  | 2.85419700  |

### 9. (Li<sup>+</sup>)<sub>2</sub>-(H<sub>2</sub>)<sub>7</sub>

**E= -745.40880411**

|   |             |             |             |
|---|-------------|-------------|-------------|
| C | 0.16210000  | -2.35223100 | 0.05467600  |
| H | -0.06313300 | -2.97419500 | 0.92291700  |
| H | 0.42848400  | -3.00999600 | -0.77455100 |
| C | 1.32985800  | -1.40798700 | 0.39175000  |
| H | 2.19885500  | -2.00017500 | 0.71152700  |
| C | -1.06282700 | -1.50770900 | -0.33837500 |
| H | -1.89116200 | -2.17317000 | -0.61988400 |
| C | -1.50257800 | -0.64765600 | 0.86798100  |
| C | 0.89462500  | -0.48755500 | 1.54949500  |
| H | 1.70768700  | 0.15492400  | 1.90728000  |
| H | 0.62941600  | -1.10944900 | 2.40534000  |
| C | -0.34145400 | 0.35892900  | 1.15465200  |
| H | -0.62829000 | 1.00719800  | 2.00008700  |
| C | 0.04695900  | 1.24878200  | -0.05727400 |
| C | 1.71438200  | -0.59821300 | -0.86713200 |
| C | -0.68760400 | -0.63281800 | -1.55129100 |
| H | -0.38611600 | -1.28585600 | -2.37120900 |
| H | -1.54066900 | -0.06370200 | -1.94033600 |
| C | 0.49290500  | 0.31303000  | -1.21345500 |
| H | 0.74036300  | 0.92457100  | -2.09759500 |
| N | 2.94564600  | 0.20478900  | -0.57440800 |
| H | 3.71015200  | -0.47197300 | -0.49448700 |
| H | 3.18234900  | 0.73200600  | -1.42023000 |
| N | 1.13399500  | 2.16904500  | 0.37488100  |
| H | 1.38347300  | 2.76890200  | -0.41673800 |
| N | 1.91969000  | -1.49902600 | -1.98168000 |
| H | 2.26623700  | -1.02499200 | -2.81402400 |
| H | 2.56401000  | -2.25571900 | -1.75799800 |
| N | -1.09441400 | 2.07204700  | -0.54124400 |

|    |             |             |             |
|----|-------------|-------------|-------------|
| H  | -1.37600300 | 2.70583800  | 0.21218200  |
| H  | -0.75108500 | 2.68672400  | -1.28454100 |
| N  | -2.78052400 | 0.05420400  | 0.52703000  |
| H  | -3.50080100 | -0.67280100 | 0.48444400  |
| H  | -3.05932400 | 0.61324300  | 1.33924000  |
| N  | -1.65312100 | -1.48967000 | 2.03658000  |
| H  | -2.03238500 | -0.98755600 | 2.83768900  |
| H  | -2.24951800 | -2.29652600 | 1.85976400  |
| H  | 0.74947600  | 2.80928600  | 1.07497700  |
| Li | 2.87863700  | 1.40653700  | 0.97300000  |
| Li | -2.79974800 | 1.18155200  | -1.07267800 |
| H  | -4.16978600 | -0.23196500 | -2.22546600 |
| H  | -4.67514100 | 0.27339400  | -2.03015700 |
| H  | -2.76453400 | 1.78328600  | -3.31363600 |
| H  | -2.86576100 | 2.44236700  | -2.99183700 |
| H  | -4.02880500 | 2.97378100  | -0.73535300 |
| H  | -4.52822400 | 2.46709300  | -0.52751300 |
| H  | 4.47414500  | 2.83712900  | 0.35279000  |
| H  | 4.37985000  | 2.97184200  | 1.07556900  |
| H  | 4.14646900  | 0.29166200  | 2.46385700  |
| H  | 4.66281800  | 0.32207500  | 1.93375600  |
| H  | 2.63100000  | 2.08915600  | 3.22144400  |
| H  | 2.73576000  | 2.74729100  | 2.89894600  |
| H  | -5.78617200 | 0.39779000  | 0.46012200  |
| H  | -6.10741100 | 0.49509000  | 1.11837500  |

### 9. $(\text{Li}^+)_2\text{-(H}_2)_8$

**E= -746.57438923**

|   |             |             |             |
|---|-------------|-------------|-------------|
| C | -0.00813300 | -2.36938400 | 0.02982500  |
| H | -0.28188000 | -2.99761000 | 0.87937300  |
| H | 0.26078100  | -3.02228700 | -0.80247800 |
| C | 1.18131700  | -1.47405000 | 0.41979700  |
| H | 2.01826700  | -2.10293400 | 0.75477100  |
| C | -1.19011000 | -1.47527400 | -0.38467400 |
| H | -2.03243400 | -2.10628300 | -0.70175600 |
| C | -1.63432500 | -0.62120000 | 0.82446100  |
| C | 0.74566000  | -0.55679900 | 1.57987700  |
| H | 1.57069600  | 0.05132600  | 1.96983000  |
| H | 0.43515100  | -1.18152200 | 2.41830100  |
| C | -0.44846600 | 0.33866100  | 1.16317600  |
| H | -0.73836100 | 0.98273500  | 2.01067000  |
| C | 0.00685300  | 1.23333200  | -0.02135300 |
| C | 1.63263900  | -0.65771400 | -0.81235300 |
| C | -0.74693100 | -0.59480900 | -1.57031500 |
| H | -0.44260700 | -1.24501800 | -2.39149600 |
| H | -1.56632900 | 0.01094700  | -1.97626600 |
| C | 0.45512900  | 0.30161500  | -1.17932100 |
| H | 0.75088300  | 0.91886000  | -2.04451800 |
| N | 2.88131500  | 0.09515900  | -0.46812300 |
| H | 3.61504100  | -0.61170500 | -0.36537600 |



|    |             |             |             |
|----|-------------|-------------|-------------|
| H  | 3.17208100  | 0.61842100  | -1.29971700 |
| N  | 1.11109100  | 2.10886600  | 0.45665400  |
| H  | 1.40782800  | 2.70672700  | -0.32007200 |
| N  | 1.84031200  | -1.54631800 | -1.93639700 |
| H  | 2.22530200  | -1.06995900 | -2.75034200 |
| H  | 2.45356500  | -2.32713800 | -1.70832400 |
| N  | -1.09025400 | 2.10375400  | -0.52585300 |
| H  | -1.37298100 | 2.73486800  | 0.22943900  |
| H  | -0.70259200 | 2.71792400  | -1.24740000 |
| N  | -2.87662000 | 0.13109700  | 0.46146500  |
| H  | -3.62003700 | -0.56919500 | 0.38523800  |
| H  | -3.15853400 | 0.68524700  | 1.27589300  |
| N  | -1.84758700 | -1.47704400 | 1.97315600  |
| H  | -2.22874500 | -0.97436600 | 2.77303800  |
| H  | -2.46909600 | -2.25746000 | 1.76670300  |
| H  | 0.72600100  | 2.75567700  | 1.15028400  |
| Li | 2.81952600  | 1.28876900  | 1.08667000  |
| Li | -2.81048600 | 1.28358700  | -1.12185400 |
| H  | -4.18596000 | -0.07636000 | -2.32323900 |
| H  | -4.68938000 | 0.43043700  | -2.12659200 |
| H  | -2.69696700 | 1.90902100  | -3.34303500 |
| H  | -2.79752700 | 2.56796500  | -3.02066100 |
| H  | -4.01613800 | 3.09815900  | -0.78956700 |
| H  | -4.51614100 | 2.59256300  | -0.58042500 |
| H  | 4.39291000  | 2.71399700  | 0.46276300  |
| H  | 4.11917200  | 3.04412900  | 1.06718000  |
| H  | 4.15491500  | 0.21464700  | 2.51446700  |
| H  | 4.66744300  | 0.25951300  | 1.98152600  |
| H  | 2.66863100  | 1.93916700  | 3.34295300  |
| H  | 2.58891800  | 2.59595100  | 3.01085100  |
| H  | -5.88158300 | 0.56446400  | 0.34467600  |
| H  | -6.20271600 | 0.66108600  | 1.00308800  |
| H  | 5.96734700  | 0.36915000  | -0.68316700 |
| H  | 6.28836200  | 1.02691600  | -0.78208700 |

**H<sub>2</sub>**

**E=-1.16356551**

|   |            |            |             |
|---|------------|------------|-------------|
| H | 0.00000000 | 0.00000000 | 0.36826300  |
| H | 0.00000000 | 0.00000000 | -0.36826300 |

**10.(Li<sup>+</sup>)<sub>2</sub>-(CO<sub>2</sub>)**

**E=-925.77153461**

|   |             |            |             |
|---|-------------|------------|-------------|
| C | -1.66616200 | 1.21983400 | -1.65916500 |
| H | -2.03297400 | 2.24795400 | -1.64876900 |
| H | -1.75472600 | 0.83921000 | -2.67815300 |
| C | -2.50719200 | 0.37051300 | -0.68994300 |
| H | -3.56736600 | 0.43705500 | -0.97171300 |
| C | -0.19245300 | 1.16382100 | -1.22022000 |

|    |             |             |             |
|----|-------------|-------------|-------------|
| H  | 0.42221300  | 1.73397700  | -1.93068000 |
| C  | -0.04972600 | 1.79641400  | 0.18155800  |
| C  | -2.32855700 | 0.93509600  | 0.73404300  |
| H  | -2.97200100 | 0.43853300  | 1.47170400  |
| H  | -2.65459500 | 1.97581100  | 0.73777300  |
| C  | -0.84204800 | 0.88407400  | 1.17379100  |
| H  | -0.74568000 | 1.29500400  | 2.19293300  |
| C  | -0.38726900 | -0.60177300 | 1.17840500  |
| C  | -2.05736000 | -1.10474900 | -0.77886100 |
| C  | 0.26753300  | -0.30852200 | -1.22752000 |
| H  | 0.14331400  | -0.70517400 | -2.23569000 |
| H  | 1.33426900  | -0.41883800 | -1.00450200 |
| C  | -0.58603700 | -1.16453500 | -0.25560100 |
| H  | -0.23700900 | -2.21059300 | -0.28429100 |
| N  | -2.98695500 | -1.94940500 | 0.04492200  |
| H  | -3.88731200 | -1.93313300 | -0.44353400 |
| H  | -2.68571900 | -2.92420400 | -0.04923300 |
| N  | -1.19833600 | -1.32946200 | 2.19832100  |
| H  | -0.86657700 | -2.29778400 | 2.23589500  |
| N  | -2.05066800 | -1.52965700 | -2.16193100 |
| H  | -1.84583100 | -2.52121600 | -2.27250800 |
| H  | -2.93031500 | -1.33231700 | -2.63630300 |
| N  | 1.04589500  | -0.75921300 | 1.53947500  |
| H  | 1.17570900  | -0.43804500 | 2.50296600  |
| H  | 1.26511300  | -1.75892000 | 1.56495800  |
| N  | 1.40374000  | 1.88273500  | 0.53506200  |
| H  | 1.80474500  | 2.58587600  | -0.09241800 |
| H  | 1.47428900  | 2.32146200  | 1.45816400  |
| N  | -0.67493500 | 3.10241800  | 0.19396400  |
| H  | -0.52416900 | 3.60337800  | 1.06808100  |
| H  | -0.35144100 | 3.69520600  | -0.56879200 |
| H  | -0.96718900 | -0.94330000 | 3.11828300  |
| Li | -3.13947700 | -1.48240600 | 1.91850900  |
| Li | 2.44789100  | 0.23279500  | 0.52604300  |
| C  | 5.27492800  | -0.68287000 | -0.36401500 |
| O  | 6.33819200  | -0.95834200 | -0.69198400 |
| O  | 4.18091700  | -0.40501300 | -0.02693300 |

### 10.(Li<sup>+</sup>)<sub>2</sub>O-(CO<sub>2</sub>)<sub>2</sub>

**E=-1114.31076091**

|   |             |             |             |
|---|-------------|-------------|-------------|
| C | 0.00159400  | -2.75349900 | -0.00372500 |
| H | 0.16809800  | -3.39465200 | 0.86377400  |
| H | -0.16400400 | -3.39230300 | -0.87313000 |
| C | 1.23322200  | -1.85671800 | -0.21656900 |
| H | 2.12800000  | -2.48449200 | -0.33158900 |
| C | -1.23134600 | -1.85912600 | 0.21174600  |
| H | -2.12520800 | -2.48855200 | 0.32482800  |
| C | -1.04215800 | -1.02666100 | 1.49936400  |

|    |             |             |             |
|----|-------------|-------------|-------------|
| C  | 1.40951700  | -0.95567000 | 1.02217600  |
| H  | 2.31855400  | -0.34578400 | 0.97113400  |
| H  | 1.54116100  | -1.59293000 | 1.89762000  |
| C  | 0.16182600  | -0.06324700 | 1.24483200  |
| H  | 0.31424500  | 0.56522500  | 2.13885000  |
| C  | -0.00100600 | 0.85385100  | 0.00170600  |
| C  | 1.04278700  | -1.02065500 | -1.50168100 |
| C  | -1.40893400 | -0.95462500 | -1.02427200 |
| H  | -1.53961500 | -1.58941200 | -1.90165600 |
| H  | -2.31889700 | -0.34626500 | -0.97139700 |
| C  | -0.16257000 | -0.05970600 | -1.24421800 |
| H  | -0.31589000 | 0.57128400  | -2.13630600 |
| N  | 2.30797200  | -0.27147000 | -1.78926100 |
| H  | 3.00280600  | -0.97827000 | -2.04725400 |
| H  | 2.16888500  | 0.25333900  | -2.65800400 |
| N  | 1.19890100  | 1.73027900  | -0.08580200 |
| H  | 1.07258100  | 2.36926800  | -0.87583800 |
| N  | 0.68282900  | -1.89262400 | -2.60098400 |
| H  | 0.63808700  | -1.40337600 | -3.49327500 |
| H  | 1.32739800  | -2.67497300 | -2.70236500 |
| N  | -1.20212100 | 1.72834000  | 0.09180200  |
| H  | -1.07678800 | 2.36514500  | 0.88375800  |
| H  | -1.21550600 | 2.33649100  | -0.73164700 |
| N  | -2.30841000 | -0.28011400 | 1.78913100  |
| H  | -3.00215900 | -0.98865000 | 2.04527000  |
| H  | -2.16997900 | 0.24245900  | 2.65933000  |
| N  | -0.68104300 | -1.90137500 | 2.59608800  |
| H  | -0.63694400 | -1.41469600 | 3.48981600  |
| H  | -1.32453600 | -2.68490400 | 2.69518300  |
| H  | 1.21132300  | 2.33603300  | 0.73943400  |
| Li | 2.98923400  | 0.93826200  | -0.41079800 |
| Li | -2.99140600 | 0.93279000  | 0.41434900  |
| C  | -5.88449600 | 1.67361700  | -0.42382800 |
| O  | -6.97226700 | 1.92685600  | -0.68256800 |
| O  | -4.76629000 | 1.41461300  | -0.16056600 |
| C  | 5.88448900  | 1.67210500  | 0.42656900  |
| O  | 6.97198500  | 1.92616300  | 0.68567400  |
| O  | 4.76662800  | 1.41206900  | 0.16288500  |

### 10.(Li<sup>+</sup>)<sub>2</sub>-(CO<sub>2</sub>)<sub>3</sub>

E=-1302.84272651

|   |            |             |            |
|---|------------|-------------|------------|
| C | 0.84983100 | -2.55434300 | 1.43737300 |
| H | 1.04430500 | -2.60410900 | 2.51028000 |
| H | 0.81219900 | -3.57432300 | 1.05083000 |
| C | 1.97420700 | -1.75813300 | 0.75296000 |
| H | 2.94329500 | -2.22750400 | 0.97365500 |

|    |             |             |             |
|----|-------------|-------------|-------------|
| C  | -0.49198100 | -1.85575900 | 1.16076100  |
| H  | -1.30746500 | -2.43788000 | 1.61290600  |
| C  | -0.47690300 | -0.44804000 | 1.79594700  |
| C  | 1.97176900  | -0.32042900 | 1.31147300  |
| H  | 2.80287900  | 0.28109100  | 0.92610300  |
| H  | 2.12950300  | -0.36821600 | 2.38957700  |
| C  | 0.61479400  | 0.37818800  | 1.04188100  |
| H  | 0.63949100  | 1.40083100  | 1.45581600  |
| C  | 0.40895600  | 0.45890300  | -0.49610200 |
| C  | 1.75070000  | -1.77145400 | -0.77553700 |
| C  | -0.71765200 | -1.77691700 | -0.36214100 |
| H  | -0.73735600 | -2.79020500 | -0.76535900 |
| H  | -1.68596300 | -1.33134300 | -0.60556000 |
| C  | 0.42715500  | -0.99093900 | -1.05141700 |
| H  | 0.24911000  | -0.96072700 | -2.14008800 |
| N  | 2.93174800  | -1.13668000 | -1.44579800 |
| H  | 3.71591200  | -1.77980300 | -1.30368600 |
| H  | 2.77237100  | -1.17569000 | -2.45691300 |
| N  | 1.50256900  | 1.29917800  | -1.06126300 |
| H  | 1.33951300  | 1.40086600  | -2.06690100 |
| N  | 1.55797400  | -3.13386000 | -1.22889400 |
| H  | 1.48571500  | -3.20362000 | -2.24257000 |
| H  | 2.30594400  | -3.75399700 | -0.92260500 |
| N  | -0.88769100 | 1.08071100  | -0.86453500 |
| H  | -0.88094500 | 2.05589900  | -0.55285900 |
| H  | -0.94109700 | 1.13173200  | -1.88539100 |
| N  | -1.83350300 | 0.16489600  | 1.66729900  |
| H  | -2.45545400 | -0.39561200 | 2.25647000  |
| H  | -1.80884300 | 1.07403700  | 2.13881200  |
| N  | -0.07040200 | -0.54692300 | 3.18532000  |
| H  | -0.14086700 | 0.34282000  | 3.67647800  |
| H  | -0.62349400 | -1.23171900 | 3.69840700  |
| H  | 1.40053000  | 2.24577300  | -0.68516300 |
| Li | 3.38771900  | 0.68595200  | -0.93011200 |
| Li | -2.64619500 | 0.52239100  | -0.08619400 |
| C  | -5.07669400 | -1.08747600 | -1.28173200 |
| O  | -5.97592400 | -1.66337000 | -1.70406600 |
| O  | -4.15534700 | -0.49746700 | -0.85077500 |
| C  | 6.03802100  | 2.21829700  | -0.42839300 |
| O  | 7.05499600  | 2.72473600  | -0.27306400 |
| O  | 4.99207400  | 1.70104300  | -0.58543900 |
| C  | -4.40269000 | 3.14626700  | 0.13148100  |
| O  | -5.22421400 | 3.94699400  | 0.18971800  |
| O  | -3.55481100 | 2.33261800  | 0.07393100  |

**10.(Li<sup>+</sup>)<sub>2</sub>-(CO<sub>2</sub>)<sub>4</sub>**

**E=-1491.37444975**

|   |            |             |             |
|---|------------|-------------|-------------|
| C | 0.00031500 | -3.18622200 | -0.00011000 |
|---|------------|-------------|-------------|

|    |             |             |             |
|----|-------------|-------------|-------------|
| H  | 0.07814600  | -3.82655300 | 0.88062600  |
| H  | -0.07736800 | -3.82662200 | -0.88081000 |
| C  | 1.24691400  | -2.29002900 | -0.08968400 |
| H  | 2.14895600  | -2.91767900 | -0.11614300 |
| C  | -1.24648600 | -2.29030000 | 0.08939400  |
| H  | -2.14839000 | -2.91814500 | 0.11588600  |
| C  | -1.18516500 | -1.45567100 | 1.38730700  |
| C  | 1.30497500  | -1.38306400 | 1.15542200  |
| H  | 2.20582700  | -0.76486000 | 1.16426700  |
| H  | 1.35711200  | -2.01395000 | 2.04368200  |
| C  | 0.03838000  | -0.49536900 | 1.25331400  |
| H  | 0.09912100  | 0.13524800  | 2.15698100  |
| C  | -0.00007600 | 0.42025800  | -0.00023900 |
| C  | 1.18539700  | -1.45551200 | -1.38765800 |
| C  | -1.30474700 | -1.38343100 | -1.15576900 |
| H  | -1.35674700 | -2.01438900 | -2.04398400 |
| H  | -2.20573600 | -0.76543800 | -1.16466200 |
| C  | -0.03834900 | -0.49546400 | -1.25373100 |
| H  | -0.09922900 | 0.13507500  | -2.15744400 |
| N  | 2.47011000  | -0.70854000 | -1.55273300 |
| H  | 3.18807600  | -1.41516400 | -1.73531800 |
| H  | 2.41524400  | -0.18722500 | -2.43285300 |
| N  | 1.20460900  | 1.29159000  | 0.02972700  |
| H  | 1.15618200  | 1.93517600  | -0.76502500 |
| N  | 0.93393200  | -2.33151400 | -2.51696000 |
| H  | 0.98174700  | -1.84029600 | -3.40810300 |
| H  | 1.59169700  | -3.10877000 | -2.55293900 |
| N  | -1.20495000 | 1.29135200  | -0.03025800 |
| H  | -1.15657200 | 1.93505500  | 0.76440300  |
| H  | -1.14273500 | 1.89158000  | -0.85695100 |
| N  | -2.47004300 | -0.70897100 | 1.55227700  |
| H  | -3.18784800 | -1.41573500 | 1.73495100  |
| H  | -2.41531700 | -0.18749800 | 2.43231000  |
| N  | -0.93352500 | -2.33151800 | 2.51668800  |
| H  | -0.98152200 | -1.84024500 | 3.40778900  |
| H  | -1.59107700 | -3.10895300 | 2.55269200  |
| H  | 1.14227300  | 1.89191300  | 0.85634000  |
| Li | 3.07220200  | 0.59898100  | -0.21302700 |
| Li | -3.07231300 | 0.59836700  | 0.21245000  |
| C  | -5.37207300 | 0.10671800  | -1.91294700 |
| O  | -6.21411000 | -0.09289000 | -2.66822900 |
| O  | -4.50898900 | 0.31279100  | -1.14187500 |
| C  | 5.37153900  | 0.10576300  | 1.91274000  |
| O  | 6.21231300  | -0.09539800 | 2.66901800  |
| O  | 4.50978100  | 0.31346200  | 1.14062500  |
| C  | -4.77961000 | 2.83202100  | 1.62969100  |
| O  | -5.57868800 | 3.55814300  | 2.02196100  |
| O  | -3.95498200 | 2.09294600  | 1.23320100  |
| C  | 4.77970400  | 2.83324200  | -1.62831100 |
| O  | 5.57935400  | 3.55901700  | -2.02006000 |
| O  | 3.95447500  | 2.09455300  | -1.23235000 |

**10.(Li<sup>+</sup>)<sub>2</sub>-(CO<sub>2</sub>)<sub>5</sub>****E=-1679.90053374**

|    |             |             |             |
|----|-------------|-------------|-------------|
| C  | -0.38563500 | -3.07988000 | 0.79719400  |
| H  | -0.47719500 | -3.94412200 | 0.13645100  |
| H  | -0.26379000 | -3.44370200 | 1.81934400  |
| C  | -1.64988400 | -2.21256400 | 0.67576200  |
| H  | -2.53434100 | -2.81882300 | 0.91812400  |
| C  | 0.83533700  | -2.22910000 | 0.40881200  |
| H  | 1.75204700  | -2.82507900 | 0.52739800  |
| C  | 0.71380900  | -1.79713700 | -1.06898700 |
| C  | -1.77155300 | -1.70406500 | -0.77394700 |
| H  | -2.68656900 | -1.12513300 | -0.92494400 |
| H  | -1.83873900 | -2.56455400 | -1.44123300 |
| C  | -0.53259200 | -0.86449800 | -1.17039400 |
| H  | -0.63789400 | -0.52199800 | -2.21435300 |
| C  | -0.47196500 | 0.37397900  | -0.23809000 |
| C  | -1.56789000 | -1.03742300 | 1.67511600  |
| C  | 0.90949100  | -1.00534200 | 1.34277200  |
| H  | 0.99692500  | -1.35834600 | 2.37106900  |
| H  | 1.80069300  | -0.40104800 | 1.15314400  |
| C  | -0.37150200 | -0.14007100 | 1.22468500  |
| H  | -0.29434700 | 0.72596500  | 1.90450600  |
| N  | -2.86444800 | -0.29345000 | 1.66369600  |
| H  | -3.56107500 | -0.93031700 | 2.06013600  |
| H  | -2.79893900 | 0.45603700  | 2.35885200  |
| N  | -1.69674000 | 1.18765700  | -0.46975600 |
| H  | -1.62922500 | 2.03429300  | 0.10214600  |
| N  | -1.26233100 | -1.54694500 | 2.99954300  |
| H  | -1.29145200 | -0.81814500 | 3.71084900  |
| H  | -1.90569400 | -2.28464400 | 3.28253300  |
| N  | 0.71382600  | 1.21747000  | -0.51132500 |
| H  | 0.63700000  | 1.59520600  | -1.45896300 |
| H  | 0.68970900  | 2.03243100  | 0.10688200  |
| N  | 1.96881000  | -1.09840000 | -1.47521000 |
| H  | 2.69550800  | -1.81750700 | -1.51616500 |
| H  | 1.86355100  | -0.80238700 | -2.44988700 |
| N  | 0.45590500  | -2.96304900 | -1.89564600 |
| H  | 0.46687100  | -2.73970800 | -2.88961600 |
| H  | 1.13817800  | -3.70264700 | -1.73546800 |
| H  | -1.66934100 | 1.52633500  | -1.43532000 |
| Li | -3.53051000 | 0.57451800  | 0.02904800  |
| Li | 2.60994600  | 0.50751600  | -0.46627700 |
| C  | 5.44926600  | -1.03016900 | 0.50177600  |
| O  | 6.37296600  | -1.67361200 | 0.73745400  |
| O  | 4.50341400  | -0.37579100 | 0.25944800  |
| C  | -5.93813000 | -0.57153000 | -1.66707100 |
| O  | -6.80924700 | -1.03547900 | -2.25473400 |
| O  | -5.04640100 | -0.09620800 | -1.06655000 |

|   |             |            |             |
|---|-------------|------------|-------------|
| C | 4.31552300  | 2.24710800 | -2.49656900 |
| O | 5.08410500  | 2.85067900 | -3.10252800 |
| O | 3.52573800  | 1.63150100 | -1.88223200 |
| C | -5.23013200 | 3.12158300 | 0.79084000  |
| O | -6.03649200 | 3.92343600 | 0.95480300  |
| O | -4.39900600 | 2.30606000 | 0.62615800  |
| C | 3.99243200  | 2.01764700 | 1.85008600  |
| O | 4.90155800  | 2.11176100 | 2.55072400  |
| O | 3.06901600  | 1.91110200 | 1.13185400  |

### 10.(Li<sup>+</sup>)<sub>2</sub>-(CO<sub>2</sub>)<sub>6</sub>

**E=-1868.42704703**

|   |             |             |             |
|---|-------------|-------------|-------------|
| C | -0.00027500 | -3.15868700 | 0.00613900  |
| H | 0.13426100  | -3.79679800 | 0.88194400  |
| H | -0.13471500 | -3.80013200 | -0.86724300 |
| C | 1.23804200  | -2.26248100 | -0.16484100 |
| H | 2.13707300  | -2.89013700 | -0.25091500 |
| C | -1.23869300 | -2.26198700 | 0.17369200  |
| H | -2.13766900 | -2.88938800 | 0.26218700  |
| C | -1.09753000 | -1.41780100 | 1.45932300  |
| C | 1.37343400  | -1.36041900 | 1.07691800  |
| H | 2.27931100  | -0.74893700 | 1.04419000  |
| H | 1.47092700  | -1.99587600 | 1.95851800  |
| C | 0.12115500  | -0.46611100 | 1.24826400  |
| H | 0.24149100  | 0.16709000  | 2.14439300  |
| C | -0.00045000 | 0.44748100  | -0.00077600 |
| C | 1.09682700  | -1.42325300 | -1.45369600 |
| C | -1.37415700 | -1.36463200 | -1.07146700 |
| H | -1.47172400 | -2.00340000 | -1.95066200 |
| H | -2.27996300 | -0.75297400 | -1.04093400 |
| C | -0.12197000 | -0.47090600 | -1.24630800 |
| H | -0.24237900 | 0.15880700  | -2.14487500 |
| N | 2.36359500  | -0.66738400 | -1.68151300 |
| H | 3.06568400  | -1.36148000 | -1.94988100 |
| H | 2.24543200  | -0.10002100 | -2.52580600 |
| N | 1.20519900  | 1.30722500  | -0.06290900 |
| H | 1.11375200  | 1.93739100  | -0.86371200 |
| N | 0.78609400  | -2.29931700 | -2.57026100 |
| H | 0.79359000  | -1.80414900 | -3.46053200 |
| H | 1.44336000  | -3.07473300 | -2.64071600 |
| N | -1.20621200 | 1.30726400  | 0.05810000  |
| H | -1.11471400 | 1.94063400  | 0.85635500  |
| H | -1.21193000 | 1.91489400  | -0.76507200 |
| N | -2.36443000 | -0.66125300 | 1.68428900  |
| H | -3.06643700 | -1.35448100 | 1.95509200  |
| H | -2.24634300 | -0.09094500 | 2.52660600  |
| N | -0.78664900 | -2.28955900 | 2.57919600  |
| H | -0.79396700 | -1.79097700 | 3.46755900  |

|    |             |             |             |
|----|-------------|-------------|-------------|
| H  | -1.44390300 | -3.06469500 | 2.65272300  |
| H  | 1.21062100  | 1.91816200  | 0.75781400  |
| Li | 3.07681400  | 0.56995400  | -0.27775800 |
| Li | -3.07800800 | 0.57098700  | 0.27565700  |
| C  | -5.90017400 | -1.24886800 | -0.05856100 |
| O  | -6.81192800 | -1.95009200 | -0.04257100 |
| O  | -4.96703000 | -0.53464500 | -0.07204600 |
| C  | 4.56774600  | 1.30827600  | 2.32816300  |
| O  | 5.48198900  | 1.17740400  | 3.01613500  |
| O  | 3.63812300  | 1.43426400  | 1.62124900  |
| C  | -4.76465400 | 2.80877500  | 1.78130600  |
| O  | -5.52444100 | 3.56406600  | 2.19914400  |
| O  | -3.98378500 | 2.03952700  | 1.35915500  |
| C  | 4.76672200  | 2.79698100  | -1.79088400 |
| O  | 5.53290600  | 3.54545000  | -2.20932900 |
| O  | 3.97922400  | 2.03479600  | -1.36817800 |
| C  | -4.56742200 | 1.29691800  | -2.33409900 |
| O  | -5.48158400 | 1.16196600  | -3.02140200 |
| O  | -3.63788500 | 1.42693200  | -1.62782000 |
| C  | 5.90013100  | -1.24824600 | 0.06263600  |
| O  | 6.81102500  | -1.95065400 | 0.04987000  |
| O  | 4.96791800  | -0.53273200 | 0.07280500  |

### 10.(Li<sup>+</sup>)<sub>2</sub>-(CO<sub>2</sub>)<sub>7</sub>

**E=-2056.95114883**

|   |             |             |             |
|---|-------------|-------------|-------------|
| C | -0.53868800 | -3.52889800 | 0.00284400  |
| H | -0.75454200 | -4.15388400 | -0.86619200 |
| H | -0.45891800 | -4.17769100 | 0.87752800  |
| C | -1.67379100 | -2.50738500 | 0.18786500  |
| H | -2.63202500 | -3.03697300 | 0.29306800  |
| C | 0.78428800  | -2.76820200 | -0.19008000 |
| H | 1.61071400  | -3.48726700 | -0.28779200 |
| C | 0.71123000  | -1.91993900 | -1.47922600 |
| C | -1.73413300 | -1.60301000 | -1.05829200 |
| H | -2.57109300 | -0.90069100 | -1.01642200 |
| H | -1.91131800 | -2.22992100 | -1.93354000 |
| C | -0.39794600 | -0.84562900 | -1.25506000 |
| H | -0.46557600 | -0.20851200 | -2.15382400 |
| C | -0.15926700 | 0.05882100  | -0.01550600 |
| C | -1.42448500 | -1.67911900 | 1.46800300  |
| C | 1.03032400  | -1.88418400 | 1.04840300  |
| H | 1.06877000  | -2.52626100 | 1.92950500  |
| H | 1.99572300  | -1.37352400 | 1.00549200  |
| C | -0.11668400 | -0.86119600 | 1.23438800  |
| H | 0.08438600  | -0.24304700 | 2.12650800  |
| N | -2.60034700 | -0.79334400 | 1.71075700  |
| H | -3.36633100 | -1.40660600 | 2.00025600  |
| H | -2.40591000 | -0.23354900 | 2.54590800  |
| N | -1.26812600 | 1.04156700  | 0.05846200  |



|    |             |             |             |
|----|-------------|-------------|-------------|
| H  | -1.08984500 | 1.66792000  | 0.84744400  |
| N  | -1.18936500 | -2.57601800 | 2.58673900  |
| H  | -1.12393400 | -2.07620300 | 3.47208400  |
| H  | -1.92679800 | -3.27323900 | 2.67762300  |
| N  | 1.12774300  | 0.78433100  | -0.09831500 |
| H  | 1.09856900  | 1.42311600  | -0.89676400 |
| H  | 1.21765900  | 1.39893800  | 0.71469100  |
| N  | 2.04481500  | -1.30049300 | -1.72740900 |
| H  | 2.66777100  | -2.06066200 | -2.01101900 |
| H  | 1.97363400  | -0.71562500 | -2.56486700 |
| N  | 0.29273300  | -2.75884100 | -2.58971000 |
| H  | 0.33777200  | -2.26403400 | -3.47916600 |
| H  | 0.86994800  | -3.59463300 | -2.67164100 |
| H  | -1.22299500 | 1.63995700  | -0.77034000 |
| Li | -3.20453900 | 0.49539600  | 0.31297800  |
| Li | 2.90120100  | -0.16482100 | -0.32545700 |
| C  | 5.50506100  | -2.30068600 | -0.06458400 |
| O  | 6.36109400  | -3.06237200 | -0.16853900 |
| O  | 4.62723800  | -1.52650800 | 0.03841500  |
| C  | 4.57732600  | 2.14252500  | -1.54765600 |
| O  | 5.13385100  | 3.14170100  | -1.68721300 |
| O  | 4.01535800  | 1.12241700  | -1.41390400 |
| C  | 2.74045400  | 4.63164000  | -0.08139800 |
| O  | 2.94253200  | 5.75656600  | 0.06982200  |
| O  | 2.52957200  | 3.48620700  | -0.23109400 |
| C  | 4.49071800  | 0.29163700  | 2.25123000  |
| O  | 5.36219400  | -0.04060200 | 2.92717600  |
| O  | 3.60382200  | 0.62505800  | 1.55703300  |
| C  | -6.18131100 | -1.05083700 | -0.03263900 |
| O  | -7.15096600 | -1.66971200 | -0.02264000 |
| O  | -5.18896700 | -0.42144100 | -0.04031800 |
| C  | -4.66919400 | 2.87757600  | 1.81604200  |
| O  | -5.35724300 | 3.69968200  | 2.23266800  |
| O  | -3.96172700 | 2.04000900  | 1.39487700  |
| C  | -4.63864600 | 1.39018900  | -2.29519100 |
| O  | -3.69517200 | 1.41852800  | -1.59638000 |
| O  | -5.56775500 | 1.35551800  | -2.97485700 |

### 10.(Li<sup>+</sup>)<sub>2</sub>-(CO<sub>2</sub>)<sub>8</sub>

**E=-2245.47671795**

|   |             |             |             |
|---|-------------|-------------|-------------|
| C | 0.40297400  | -3.32125700 | -0.38097400 |
| H | 0.65112400  | -4.02875200 | 0.41284000  |
| H | 0.41513500  | -3.85728500 | -1.33212500 |
| C | 1.43506900  | -2.18162000 | -0.38722800 |
| H | 2.44352500  | -2.59966900 | -0.51949800 |
| C | -0.99366500 | -2.72001200 | -0.15066400 |
| H | -1.74846800 | -3.51944900 | -0.17915600 |
| C | -1.03939700 | -2.04565600 | 1.23757100  |
| C | 1.37386200  | -1.43421900 | 0.95850800  |

|    |             |             |             |
|----|-------------|-------------|-------------|
| H  | 2.12600300  | -0.64368600 | 1.01669000  |
| H  | 1.60122500  | -2.13873300 | 1.76053600  |
| C  | -0.03942500 | -0.85002100 | 1.19760800  |
| H  | -0.06342700 | -0.33210100 | 2.17197300  |
| C  | -0.33170600 | 0.18072500  | 0.07440600  |
| C  | 1.14296900  | -1.22720900 | -1.56565400 |
| C  | -1.29370400 | -1.70723000 | -1.27386600 |
| H  | -1.25518400 | -2.22889400 | -2.23116800 |
| H  | -2.30347900 | -1.29522900 | -1.19244000 |
| C  | -0.24409200 | -0.56768900 | -1.28435700 |
| H  | -0.47701600 | 0.14076100  | -2.09788100 |
| N  | 2.24109100  | -0.22057400 | -1.65582300 |
| H  | 3.08787800  | -0.73915100 | -1.90300800 |
| H  | 2.06149800  | 0.36743400  | -2.47489500 |
| N  | 0.67014900  | 1.27078300  | 0.17765300  |
| H  | 0.43619800  | 1.99037900  | -0.51160600 |
| N  | 1.02323200  | -1.99521600 | -2.79353000 |
| H  | 0.91429600  | -1.39729400 | -3.61134200 |
| H  | 1.83628600  | -2.58913800 | -2.94986800 |
| N  | -1.68678500 | 0.76255400  | 0.19571800  |
| H  | -1.74067900 | 1.29676000  | 1.06646600  |
| H  | -1.81629200 | 1.46278900  | -0.53863700 |
| N  | -2.43415800 | -1.59788000 | 1.51242900  |
| H  | -2.98356700 | -2.44680100 | 1.66773000  |
| H  | -2.44406500 | -1.12972200 | 2.42316100  |
| N  | -0.56587400 | -2.97945800 | 2.24662400  |
| H  | -0.68228300 | -2.61150000 | 3.18960100  |
| H  | -1.05999700 | -3.86948600 | 2.19964500  |
| H  | 0.54979800  | 1.72904800  | 1.08492400  |
| Li | 2.62304400  | 1.05055500  | -0.19457400 |
| Li | -3.38031700 | -0.34907000 | 0.26663900  |
| C  | -5.79694100 | -2.59188600 | -0.34314000 |
| O  | -6.59179300 | -3.42285600 | -0.38005500 |
| O  | -4.98255900 | -1.74591700 | -0.30395200 |
| C  | 4.65228500  | 1.25529900  | 1.91258400  |
| O  | 5.74302100  | 1.10404400  | 2.25082800  |
| O  | 3.54237400  | 1.41304300  | 1.56404200  |
| C  | -5.17196000 | 1.63204900  | 1.83352900  |
| O  | -5.81632700 | 2.54638700  | 2.10833000  |
| O  | -4.51976600 | 0.69587200  | 1.56266800  |
| C  | -3.54745300 | 4.47628700  | 0.70962100  |
| O  | -3.81204000 | 5.59842100  | 0.71330700  |
| O  | -3.27259500 | 3.33487100  | 0.70153000  |
| C  | -5.00037500 | 0.42167700  | -2.22262500 |
| O  | -5.84156600 | 0.15657400  | -2.96353500 |
| O  | -4.14420600 | 0.68626300  | -1.46328200 |
| C  | 5.29491600  | -2.23704700 | 1.12512400  |
| O  | 5.81447500  | -3.15845400 | 1.58245800  |
| O  | 4.75357000  | -1.30418100 | 0.65908700  |
| C  | 6.06901300  | 0.51925500  | -0.98222300 |
| O  | 7.04832900  | -0.08239700 | -1.06255800 |

|   |            |            |             |
|---|------------|------------|-------------|
| O | 5.06444700 | 1.12225100 | -0.89904800 |
| C | 3.76423500 | 3.57199900 | -1.40015600 |
| O | 2.85823700 | 2.89536100 | -1.07821800 |
| O | 4.64765700 | 4.23735900 | -1.71635500 |

**CO<sub>2</sub>**

**E=-188.51605286**

|   |            |            |             |
|---|------------|------------|-------------|
| C | 0.00000000 | 0.00000000 | 0.00000000  |
| O | 0.00000000 | 0.00000000 | 1.16289500  |
| O | 0.00000000 | 0.00000000 | -1.16289500 |

**11.(Li<sup>+</sup>)<sub>2</sub>-(CO)**

**E=-850.52437047**

|   |             |             |             |
|---|-------------|-------------|-------------|
| C | 1.29537100  | 1.51979400  | 1.42117200  |
| H | 1.52376900  | 2.57479100  | 1.25920100  |
| H | 1.51611700  | 1.28209200  | 2.46330000  |
| C | 2.15587600  | 0.66306100  | 0.47603900  |
| H | 3.21796900  | 0.88992600  | 0.64323800  |
| C | -0.18990400 | 1.23549400  | 1.13666800  |
| H | -0.81263900 | 1.81281400  | 1.83406000  |
| C | -0.52698500 | 1.66674200  | -0.30751000 |
| C | 1.78855700  | 1.01866900  | -0.97821700 |
| H | 2.42932300  | 0.51499100  | -1.71313600 |
| H | 1.97386600  | 2.08235400  | -1.13216700 |
| C | 0.29013000  | 0.73555100  | -1.26218800 |
| H | 0.05773600  | 1.00045200  | -2.30737800 |
| C | 0.03168400  | -0.78271500 | -1.05139600 |
| C | 1.91149400  | -0.83349800 | 0.77370100  |
| C | -0.45134000 | -0.26880300 | 1.35773400  |
| H | -0.19493100 | -0.51697500 | 2.38822600  |
| H | -1.51040100 | -0.53458100 | 1.25823500  |
| C | 0.42089300  | -1.13336200 | 0.41026500  |
| H | 0.21450400  | -2.20138300 | 0.59263700  |
| N | 2.87093900  | -1.65470600 | -0.04026700 |
| H | 3.79909000  | -1.47198800 | 0.35294700  |
| H | 2.70800800  | -2.63988500 | 0.18927500  |
| N | 0.84064800  | -1.53265000 | -2.05538100 |
| H | 0.64210700  | -2.53132100 | -1.94444000 |
| N | 2.07735400  | -1.08285900 | 2.18876100  |
| H | 2.01271600  | -2.07059200 | 2.42918300  |
| H | 2.96127700  | -0.72643700 | 2.54847200  |
| N | -1.39604400 | -1.15083300 | -1.25234000 |
| H | -1.64336400 | -0.96564600 | -2.22872200 |

|    |             |             |             |
|----|-------------|-------------|-------------|
| H  | -1.48339200 | -2.16596400 | -1.15023800 |
| N  | -2.00489200 | 1.53958300  | -0.52413000 |
| H  | -2.43674000 | 2.26550800  | 0.05547400  |
| H  | -2.20724900 | 1.84986400  | -1.47943100 |
| N  | -0.07722900 | 3.02484700  | -0.52828200 |
| H  | -0.36501400 | 3.39552100  | -1.43243900 |
| H  | -0.40284000 | 3.66539600  | 0.19389500  |
| H  | 0.48177800  | -1.30108800 | -2.98626000 |
| Li | 2.80008500  | -1.40350400 | -1.96232100 |
| Li | -2.81082800 | -0.20391400 | -0.22699300 |
| C  | -5.48770500 | -1.39265500 | 0.98245400  |
| O  | -4.50666400 | -0.99486700 | 0.55789400  |

### 11.(Li<sup>+</sup>)<sub>2</sub>-(CO)<sub>2</sub>

**E=-963.81617562**

|   |             |             |             |
|---|-------------|-------------|-------------|
| C | -0.00164000 | -2.52182300 | 0.00887600  |
| H | 0.11302200  | -3.15881900 | 0.88777100  |
| H | -0.11719900 | -3.16514200 | -0.86527800 |
| C | 1.24178600  | -1.62807100 | -0.13770400 |
| H | 2.14021900  | -2.25803000 | -0.19740300 |
| C | -1.24372800 | -1.62519500 | 0.14892100  |
| H | -2.14315000 | -2.25329000 | 0.21328300  |
| C | -1.12690300 | -0.78698400 | 1.44158800  |
| C | 1.34787200  | -0.72160900 | 1.10522400  |
| H | 2.26051000  | -0.11447300 | 1.10647100  |
| H | 1.42666200  | -1.35471000 | 1.98980900  |
| C | 0.09111200  | 0.17470500  | 1.25124600  |
| H | 0.19252300  | 0.80750800  | 2.14922300  |
| C | 0.00109700  | 1.08467100  | -0.00448800 |
| C | 1.12640100  | -0.79918300 | -1.43654100 |
| C | -1.34842100 | -0.72765600 | -1.10065900 |
| H | -1.42832400 | -1.36712100 | -1.98054500 |
| H | -2.26009000 | -0.11908400 | -1.10626400 |
| C | -0.09030300 | 0.16557500  | -1.25341500 |
| H | -0.19081000 | 0.79181500  | -2.15608000 |
| N | 2.40835200  | -0.05279000 | -1.65595500 |
| H | 3.11346200  | -0.76207100 | -1.87714000 |
| H | 2.31735600  | 0.47097500  | -2.53187700 |
| N | 1.20509100  | 1.96105900  | -0.02771000 |
| H | 1.12916200  | 2.58915200  | -0.83298600 |
| N | 0.82855700  | -1.67585200 | -2.54917900 |
| H | 0.83296200  | -1.19280400 | -3.44595200 |
| H | 1.47406600  | -2.46160800 | -2.61017400 |
| N | -1.20163400 | 1.96295800  | 0.01232800  |
| H | -1.12458400 | 2.59713800  | 0.81271200  |
| H | -1.16077700 | 2.57396700  | -0.80811700 |
| N | -2.40783500 | -0.03730900 | 1.65578300  |
| H | -3.11394500 | -0.74407700 | 1.88178800  |

|    |             |             |             |
|----|-------------|-------------|-------------|
| H  | -2.31616300 | 0.49238100  | 2.52806000  |
| N  | -0.82985200 | -1.65593700 | 2.56048400  |
| H  | -0.83347300 | -1.16639900 | 3.45372800  |
| H  | -1.47630300 | -2.44044600 | 2.62726300  |
| H  | 1.16485100  | 2.57840300  | 0.78800100  |
| Li | 2.99961100  | 1.14955600  | -0.24381900 |
| Li | -2.99707600 | 1.15588100  | 0.23506400  |
| C  | -5.85214900 | 1.65528100  | -1.05024600 |
| O  | -4.82540400 | 1.47423800  | -0.58833600 |
| C  | 5.85078400  | 1.66382900  | 1.04305000  |
| O  | 4.82518300  | 1.47879800  | 0.58016000  |

### 11.(Li<sup>+</sup>)<sub>2</sub>-(CO)<sub>3</sub>

**E=-1077.10440274**

|   |             |             |             |
|---|-------------|-------------|-------------|
| C | 0.73544300  | -2.39981800 | 1.08593300  |
| H | 0.87689700  | -2.57866800 | 2.15338600  |
| H | 0.78140200  | -3.36140200 | 0.57157700  |
| C | 1.84195200  | -1.45980000 | 0.57603300  |
| H | 2.82539600  | -1.89933000 | 0.79407600  |
| C | -0.63113800 | -1.74586300 | 0.82136300  |
| H | -1.43129300 | -2.42642000 | 1.14491600  |
| C | -0.73753400 | -0.43379900 | 1.63072700  |
| C | 1.71889100  | -0.11055300 | 1.31292900  |
| H | 2.53201300  | 0.58172900  | 1.06439100  |
| H | 1.82188300  | -0.29073800 | 2.38360000  |
| C | 0.33776400  | 0.54308300  | 1.05319700  |
| H | 0.27785600  | 1.50303200  | 1.59371500  |
| C | 0.20847600  | 0.81099200  | -0.47128100 |
| C | 1.70045100  | -1.28752300 | -0.95310500 |
| C | -0.77729400 | -1.48456800 | -0.69090100 |
| H | -0.70735900 | -2.43718100 | -1.21742400 |
| H | -1.75977000 | -1.07547400 | -0.94445600 |
| C | 0.34699200  | -0.55068900 | -1.20646100 |
| H | 0.22285200  | -0.38935800 | -2.29083700 |
| N | 2.87205700  | -0.50636400 | -1.46784800 |
| H | 3.68721600  | -1.11773600 | -1.36410100 |
| H | 2.76728900  | -0.42054600 | -2.48334200 |
| N | 1.27236600  | 1.78016200  | -0.86114400 |
| H | 1.15875700  | 1.99650400  | -1.85558200 |
| N | 1.61563200  | -2.58797900 | -1.58422600 |
| H | 1.60744100  | -2.53213100 | -2.60129300 |
| H | 2.37810200  | -3.20452400 | -1.30787200 |
| N | -1.10621100 | 1.40339100  | -0.83479900 |
| H | -1.17872500 | 2.32287700  | -0.38994000 |
| H | -1.10079100 | 1.60051700  | -1.83951700 |
| N | -2.12464400 | 0.11265900  | 1.49657100  |
| H | -2.73757300 | -0.54999700 | 1.98060400  |
| H | -2.18268700 | 0.95662200  | 2.07444600  |

|    |             |             |             |
|----|-------------|-------------|-------------|
| N  | -0.40083500 | -0.68748000 | 3.01711900  |
| H  | -0.55107500 | 0.12491900  | 3.61309200  |
| H  | -0.93018800 | -1.46562200 | 3.40736200  |
| H  | 1.08621300  | 2.66544700  | -0.38155700 |
| Li | 3.17321900  | 1.24800400  | -0.69135200 |
| Li | -2.82585100 | 0.56349700  | -0.27401900 |
| C  | -5.16802900 | -1.09171200 | -1.71034200 |
| O  | -4.31909200 | -0.52063100 | -1.20869100 |
| C  | 5.83155900  | 2.68095100  | 0.25299200  |
| O  | 4.85778600  | 2.18178100  | -0.06851100 |
| C  | -4.88996800 | 3.02338500  | 0.10804600  |
| O  | -4.09993100 | 2.21357000  | -0.02575000 |

### 11.(Li<sup>+</sup>)<sub>2</sub>-(CO)<sub>4</sub>

**E=-1190.39224724**

|   |             |             |             |
|---|-------------|-------------|-------------|
| C | 0.00001300  | -2.89317300 | -0.00013500 |
| H | 0.01669000  | -3.53438000 | 0.88307900  |
| H | -0.01664900 | -3.53425900 | -0.88343900 |
| C | 1.25093100  | -1.99758200 | -0.00351500 |
| H | 2.15155200  | -2.62648300 | 0.03324600  |
| C | -1.25091900 | -1.99759900 | 0.00336000  |
| H | -2.15153200 | -2.62650700 | -0.03347500 |
| C | -1.27908600 | -1.16373500 | 1.30333700  |
| C | 1.21946200  | -1.09268900 | 1.24455000  |
| H | 2.12108700  | -0.47899500 | 1.33118900  |
| H | 1.20579700  | -1.72539100 | 2.13264300  |
| C | -0.04953100 | -0.20168000 | 1.25369100  |
| H | -0.05056700 | 0.42789900  | 2.15974000  |
| C | -0.00000400 | 0.71379900  | 0.00007200  |
| C | 1.27907700  | -1.16358400 | -1.30340200 |
| C | -1.21946100 | -1.09256600 | -1.24460300 |
| H | -1.20578300 | -1.72517200 | -2.13276700 |
| H | -2.12109100 | -0.47887000 | -1.33117800 |
| C | 0.04952300  | -0.20154300 | -1.25364500 |
| H | 0.05055200  | 0.42813400  | -2.15962600 |
| N | 2.57450000  | -0.41706100 | -1.37923300 |
| H | 3.30195700  | -1.12540600 | -1.51249900 |
| H | 2.58198400  | 0.10174100  | -2.26255600 |
| N | 1.19889300  | 1.58869000  | 0.11818100  |
| H | 1.20373000  | 2.23570700  | -0.67537400 |
| N | 1.10563400  | -2.03707300 | -2.44680400 |
| H | 1.20656300  | -1.54646600 | -3.33382300 |
| H | 1.76351800  | -2.81497900 | -2.44167500 |
| N | -1.19890700 | 1.58868700  | -0.11796100 |
| H | -1.20376400 | 2.23562100  | 0.67566200  |
| H | -1.07616200 | 2.18652500  | -0.94006200 |
| N | -2.57451400 | -0.41723000 | 1.37922200  |
| H | -3.30196700 | -1.12559400 | 1.51240600  |

|    |             |             |             |
|----|-------------|-------------|-------------|
| H  | -2.58201600 | 0.10148200  | 2.26259800  |
| N  | -1.10569400 | -2.03733400 | 2.44666400  |
| H  | -1.20665200 | -1.54680700 | 3.33372400  |
| H  | -1.76359300 | -2.81522800 | 2.44144200  |
| H  | 1.07615300  | 2.18644100  | 0.94034500  |
| Li | 3.04418300  | 0.83730200  | 0.04192800  |
| Li | -3.04418600 | 0.83726700  | -0.04181800 |
| C  | -5.34256900 | 0.43622500  | -2.23259100 |
| O  | -4.51401200 | 0.58432700  | -1.46453400 |
| C  | 5.34269400  | 0.43596400  | 2.23251200  |
| O  | 4.51412400  | 0.58419700  | 1.46449400  |
| C  | -4.84908200 | 3.19013100  | 1.30772200  |
| O  | -4.13736200 | 2.41089200  | 0.87929800  |
| C  | 4.84902900  | 3.19023700  | -1.30755500 |
| O  | 4.13729400  | 2.41099700  | -0.87915800 |

### 11.(Li<sup>+</sup>)<sub>2</sub>-(CO)<sub>5</sub>

**E=-1303.67786129**

|   |             |             |             |
|---|-------------|-------------|-------------|
| C | -0.34768900 | -2.83758800 | 0.73674800  |
| H | -0.42537900 | -3.70236700 | 0.07516200  |
| H | -0.29356700 | -3.20063900 | 1.76498500  |
| C | -1.57956500 | -1.93665000 | 0.54249100  |
| H | -2.49212200 | -2.51929500 | 0.73237200  |
| C | 0.91705400  | -2.02201600 | 0.41619600  |
| H | 1.80813600  | -2.64248100 | 0.58895800  |
| C | 0.88994600  | -1.59299900 | -1.06807700 |
| C | -1.60123700 | -1.43030500 | -0.91303400 |
| H | -2.49435100 | -0.83647100 | -1.12832500 |
| H | -1.64945600 | -2.29170300 | -1.58048400 |
| C | -0.32038500 | -0.62301000 | -1.23921400 |
| H | -0.35833800 | -0.27953100 | -2.28718300 |
| C | -0.27786700 | 0.61347200  | -0.30302000 |
| C | -1.52421500 | -0.76272800 | 1.54471900  |
| C | 0.96654400  | -0.80233600 | 1.35708400  |
| H | 0.97745600  | -1.16132300 | 2.38697500  |
| H | 1.88811500  | -0.22349400 | 1.24269100  |
| C | -0.27894000 | 0.10071600  | 1.16361900  |
| H | -0.21719400 | 0.96540700  | 1.84663700  |
| N | -2.79862000 | 0.01916300  | 1.45449200  |
| H | -3.53533900 | -0.59826900 | 1.80802300  |
| H | -2.75452400 | 0.76416400  | 2.15622100  |
| N | -1.46092100 | 1.46514500  | -0.61029900 |
| H | -1.40695000 | 2.30741600  | -0.03042300 |
| N | -1.31285300 | -1.27461900 | 2.88393500  |
| H | -1.35816400 | -0.54562200 | 3.59404200  |
| H | -1.98759000 | -1.99668600 | 3.13158500  |
| N | 0.94743100  | 1.42778800  | -0.50282400 |
| H | 0.94932200  | 1.78217100  | -1.46311300 |

|    |             |             |             |
|----|-------------|-------------|-------------|
| H  | 0.88000400  | 2.26217000  | 0.08578800  |
| N  | 2.18457500  | -0.92899400 | -1.40987200 |
| H  | 2.89477700  | -1.66636000 | -1.40076700 |
| H  | 2.14226400  | -0.64848700 | -2.39397800 |
| N  | 0.64522000  | -2.75317200 | -1.90318300 |
| H  | 0.71669200  | -2.53994600 | -2.89675800 |
| H  | 1.28933400  | -3.51593600 | -1.69980500 |
| H  | -1.36106300 | 1.80663900  | -1.57034400 |
| Li | -3.31049000 | 0.83756500  | -0.24678300 |
| Li | 2.78264300  | 0.61382500  | -0.32142700 |
| C  | 5.56719900  | -0.82342700 | 0.78146500  |
| O  | 4.60611500  | -0.34833300 | 0.40076600  |
| C  | -5.79246500 | -0.21113100 | -1.99130100 |
| O  | -4.89755600 | 0.14612700  | -1.38329400 |
| C  | 4.63507000  | 2.44450600  | -2.26337300 |
| O  | 3.93287800  | 1.82818800  | -1.61295800 |
| C  | -5.01506500 | 3.52485900  | 0.40456900  |
| O  | -4.35689300 | 2.62077800  | 0.18824200  |
| C  | 3.73523900  | 2.71848800  | 2.15856000  |
| O  | 3.35244300  | 2.03826300  | 1.33124800  |

### 11.(Li<sup>+</sup>)<sub>2</sub>-(CO)<sub>6</sub>

**E=-1416.96375087**

|   |             |             |             |
|---|-------------|-------------|-------------|
| C | 0.00005400  | -2.94995900 | 0.00007700  |
| H | 0.09612600  | -3.59012300 | 0.87920200  |
| H | -0.09598800 | -3.59021300 | -0.87899600 |
| C | 1.24551000  | -2.05401100 | -0.11649700 |
| H | 2.14657700  | -2.68213500 | -0.16366000 |
| C | -1.24546000 | -2.05406400 | 0.11661800  |
| H | -2.14648200 | -2.68224800 | 0.16382600  |
| C | -1.15696400 | -1.21568000 | 1.41111300  |
| C | 1.32607200  | -1.15473100 | 1.13271900  |
| H | 2.23484900  | -0.54567300 | 1.14934600  |
| H | 1.38491000  | -1.79185800 | 2.01618900  |
| C | 0.06763600  | -0.26038200 | 1.25262300  |
| H | 0.14856300  | 0.37087300  | 2.15432300  |
| C | -0.00003500 | 0.65422500  | -0.00003600 |
| C | 1.15695300  | -1.21578800 | -1.41102100 |
| C | -1.32611300 | -1.15487600 | -1.13263200 |
| H | -1.38499100 | -1.79204000 | -2.01606500 |
| H | -2.23490300 | -0.54584800 | -1.14921400 |
| C | -0.06769500 | -0.26050800 | -1.25263200 |
| H | -0.14863600 | 0.37066400  | -2.15438700 |
| N | 2.43122800  | -0.45717000 | -1.58896300 |
| H | 3.14859100  | -1.15177400 | -1.81492900 |
| H | 2.34986700  | 0.09403000  | -2.44830000 |
| N | 1.20757900  | 1.52066300  | -0.00442500 |
| H | 1.15933400  | 2.13645100  | -0.82072200 |



|    |             |             |             |
|----|-------------|-------------|-------------|
| N  | 0.89093700  | -2.09019200 | -2.53766200 |
| H  | 0.93037300  | -1.59810200 | -3.42878700 |
| H  | 1.54626600  | -2.86906200 | -2.58241500 |
| N  | -1.20766300 | 1.52066000  | 0.00429500  |
| H  | -1.15942600 | 2.13651700  | 0.82053900  |
| H  | -1.15108000 | 2.14942400  | -0.80110600 |
| N  | -2.43126800 | -0.45710200 | 1.58895500  |
| H  | -3.14861500 | -1.15173900 | 1.81486100  |
| H  | -2.34998600 | 0.09408900  | 2.44830700  |
| N  | -0.89092200 | -2.08987400 | 2.53790000  |
| H  | -0.93038900 | -1.59764800 | 3.42895100  |
| H  | -1.54623700 | -2.86874800 | 2.58276400  |
| H  | 1.15093400  | 2.14950100  | 0.80091400  |
| Li | 3.06473600  | 0.72930500  | -0.13425400 |
| Li | -3.06476900 | 0.72933000  | 0.13419100  |
| C  | -5.78106200 | -1.12953200 | -0.53770600 |
| O  | -4.86226500 | -0.50466900 | -0.29439400 |
| C  | 4.17162400  | 2.15176500  | 2.68840000  |
| O  | 3.74788200  | 1.70891800  | 1.73032600  |
| C  | -4.99765100 | 2.81165100  | 1.68391400  |
| O  | -4.26123800 | 2.10464900  | 1.18003100  |
| C  | 4.99761900  | 2.81170900  | -1.68386600 |
| O  | 4.26127800  | 2.10450600  | -1.18015900 |
| C  | -4.17142300 | 2.15154600  | -2.68862300 |
| O  | -3.74779500 | 1.70882300  | -1.73044100 |
| C  | 5.78100300  | -1.12961200 | 0.53767100  |
| O  | 4.86223800  | -0.50468400 | 0.29440100  |

### 11.(Li<sup>+</sup>)<sub>2</sub>-(CO)<sub>7</sub>

**E= -1530.24559457**

|   |             |             |             |
|---|-------------|-------------|-------------|
| C | 0.59402700  | -3.22942200 | -0.17134300 |
| H | 0.78512300  | -3.89706900 | 0.67114100  |
| H | 0.58229100  | -3.82831700 | -1.08395200 |
| C | 1.70174000  | -2.16295600 | -0.23618200 |
| H | 2.68131800  | -2.65573800 | -0.31754300 |
| C | -0.76351100 | -2.52380700 | -0.00762100 |
| H | -1.56807900 | -3.27310500 | 0.00338100  |
| C | -0.78776500 | -1.75140200 | 1.32984200  |
| C | 1.66218100  | -1.33502200 | 1.06344800  |
| H | 2.47977400  | -0.61004700 | 1.12230900  |
| H | 1.81089600  | -2.00916200 | 1.90834200  |
| C | 0.29306800  | -0.63001100 | 1.22902400  |
| H | 0.29090100  | -0.04421900 | 2.16437200  |
| C | 0.09327600  | 0.33427500  | 0.02930000  |
| C | 1.48956400  | -1.27369000 | -1.48189900 |
| C | -0.97576000 | -1.57740800 | -1.20507700 |
| H | -0.95031800 | -2.16719500 | -2.12212900 |
| H | -1.96189700 | -1.10295800 | -1.18794800 |
| C | 0.14525700  | -0.50995900 | -1.27221400 |
| H | -0.02970200 | 0.15357400  | -2.13673900 |

|    |             |             |             |
|----|-------------|-------------|-------------|
| N  | 2.64450800  | -0.33490300 | -1.61487900 |
| H  | 3.44907200  | -0.90789800 | -1.88349200 |
| H  | 2.47857700  | 0.24932000  | -2.43954800 |
| N  | 1.17228200  | 1.35766300  | 0.07720300  |
| H  | 1.03467600  | 2.00462000  | -0.70398900 |
| N  | 1.34324200  | -2.11156000 | -2.65681600 |
| H  | 1.29780000  | -1.56884100 | -3.51775400 |
| H  | 2.10634700  | -2.78029300 | -2.74905400 |
| N  | -1.21733400 | 1.02603400  | 0.07584100  |
| H  | -1.25399100 | 1.60734600  | 0.91751600  |
| H  | -1.25838200 | 1.69629800  | -0.69583300 |
| N  | -2.15487100 | -1.18626300 | 1.54089000  |
| H  | -2.76832700 | -1.98564400 | 1.72159100  |
| H  | -2.14918000 | -0.68088000 | 2.43170200  |
| N  | -0.40258000 | -2.63931100 | 2.41069800  |
| H  | -0.49811300 | -2.20085700 | 3.32534900  |
| H  | -0.95352300 | -3.49638000 | 2.41718800  |
| H  | 1.02999900  | 1.92744700  | 0.91530600  |
| Li | 3.11203400  | 0.83144700  | -0.08838400 |
| Li | -2.94957800 | 0.00477200  | 0.16326500  |
| C  | -5.55091400 | -1.96530800 | -0.49030500 |
| O  | -4.65537000 | -1.30392900 | -0.25696300 |
| C  | 4.02262000  | 2.16547300  | 2.86413300  |
| O  | 3.64719100  | 1.74232700  | 1.87758700  |
| C  | -4.88922200 | 1.92978000  | 1.92633500  |
| O  | -4.18439700 | 1.25933600  | 1.33631100  |
| C  | -3.01250000 | 4.81854400  | -0.19868400 |
| O  | -2.71762700 | 3.72218800  | -0.14421900 |
| C  | -4.23379300 | 1.56534700  | -2.49675700 |
| O  | -3.75007000 | 1.02371800  | -1.62205600 |
| C  | 6.10399600  | -0.57417600 | 0.39762000  |
| O  | 5.08361300  | -0.09813900 | 0.23627400  |
| C  | 4.65441600  | 3.32766000  | -1.48459800 |
| O  | 4.06423000  | 2.48352700  | -1.00012700 |

### 11.(Li<sup>+</sup>)<sub>2</sub>-(CO)<sub>8</sub>

**E= -1643.52638658**

|   |             |             |             |
|---|-------------|-------------|-------------|
| C | -0.56743500 | -2.96475100 | 0.72700600  |
| H | -0.87383100 | -3.71090600 | -0.00885800 |
| H | -0.54058200 | -3.44458900 | 1.70736500  |
| C | -1.57391000 | -1.80082900 | 0.71936800  |
| H | -2.58466000 | -2.18515800 | 0.91931000  |
| C | 0.83010200  | -2.41479900 | 0.39126400  |
| H | 1.56519400  | -3.23168100 | 0.42887800  |
| C | 0.81916100  | -1.82200800 | -1.03515500 |
| C | -1.55805000 | -1.14215100 | -0.67309000 |
| H | -2.31344300 | -0.35683200 | -0.77067800 |
| H | -1.82925800 | -1.89373300 | -1.41538500 |
| C | -0.14936400 | -0.59864200 | -1.01270500 |

|    |             |             |             |
|----|-------------|-------------|-------------|
| H  | -0.16510500 | -0.13599700 | -2.01491900 |
| C  | 0.22200100  | 0.48355600  | 0.03615000  |
| C  | -1.19838500 | -0.78783300 | 1.82436300  |
| C  | 1.20573100  | -1.35134500 | 1.44222900  |
| H  | 1.19245600  | -1.81962400 | 2.42762900  |
| H  | 2.22453000  | -0.97387700 | 1.31109000  |
| C  | 0.18793100  | -0.18498500 | 1.43703400  |
| H  | 0.47976600  | 0.56074000  | 2.19679100  |
| N  | -2.25660200 | 0.26325600  | 1.90408500  |
| H  | -3.09016400 | -0.19848400 | 2.27797700  |
| H  | -1.99040400 | 0.91924800  | 2.64409000  |
| N  | -0.76224700 | 1.59073900  | -0.07885800 |
| H  | -0.51506000 | 2.31322400  | 0.60275200  |
| N  | -1.03956000 | -1.48480200 | 3.08706900  |
| H  | -0.88505500 | -0.84623800 | 3.86572800  |
| H  | -1.85055200 | -2.05932200 | 3.31128400  |
| N  | 1.58476600  | 1.03071600  | -0.17860700 |
| H  | 1.61413000  | 1.49376700  | -1.09093600 |
| H  | 1.74141400  | 1.78609200  | 0.49326700  |
| N  | 2.20742200  | -1.41985100 | -1.40786200 |
| H  | 2.73430200  | -2.28856600 | -1.53309900 |
| H  | 2.17533300  | -1.01817100 | -2.34943300 |
| N  | 0.27699100  | -2.79834200 | -1.96269000 |
| H  | 0.35186300  | -2.49288700 | -2.93169300 |
| H  | 0.74408400  | -3.70049100 | -1.88403700 |
| H  | -0.63195800 | 2.03682800  | -0.99058200 |
| Li | -2.72994500 | 1.28576700  | 0.27710100  |
| Li | 3.20369000  | -0.16894800 | -0.23597100 |
| C  | 5.43819600  | -2.42973700 | 0.77290500  |
| O  | 4.68112900  | -1.66447700 | 0.40559200  |
| C  | -3.79044900 | 2.04025700  | -2.77868800 |
| O  | -3.35266000 | 1.86440100  | -1.74397000 |
| C  | 5.38416500  | 0.98516100  | -2.35256800 |
| O  | 4.60199800  | 0.58205600  | -1.63148700 |
| C  | 3.86105200  | 4.48321800  | -0.83077800 |
| O  | 3.41190300  | 3.45198900  | -0.66830000 |
| C  | 4.87865600  | 1.62576500  | 2.04972100  |
| O  | 4.26965000  | 1.00755400  | 1.31533400  |
| C  | -5.24025900 | -2.54209300 | -2.04342600 |
| O  | -4.68753800 | -1.72119300 | -1.48681100 |
| C  | -5.95566300 | 0.45120300  | 0.43654800  |
| O  | -4.86101200 | 0.75741200  | 0.40834300  |
| C  | -3.68121600 | 4.23208200  | 1.32376000  |
| O  | -3.27887200 | 3.22872900  | 0.96811100  |

CO

**E=-113.27699443**

|   |            |            |             |
|---|------------|------------|-------------|
| C | 0.00000000 | 0.00000000 | -0.64624400 |
|---|------------|------------|-------------|

O 0.0000000 0.0000000 0.48468300

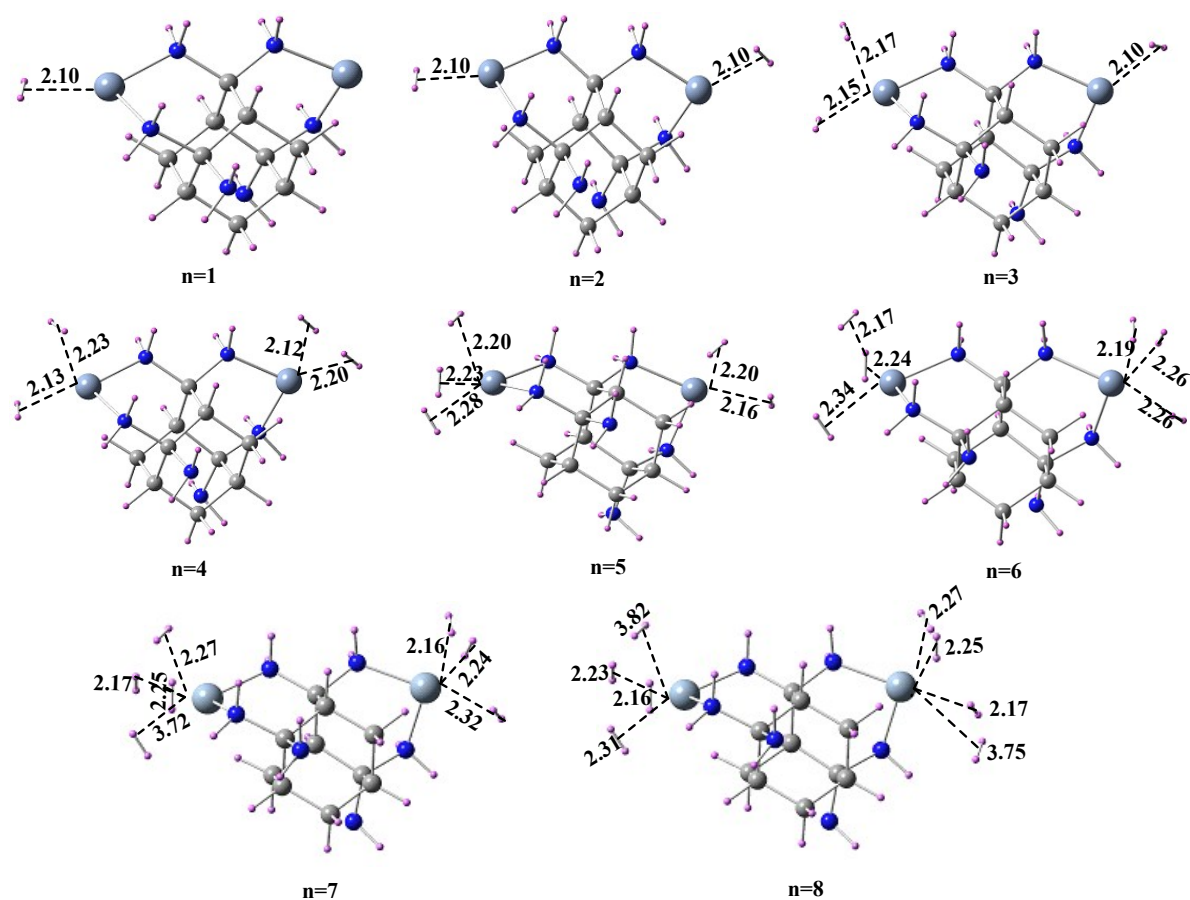

**Figure S1:** Optimized geometries of sequential adsorption of H<sub>2</sub> molecules (n=1-8) with lithiated adamantane **8** at M06-2X/6-31+G(d) level of theory. Distances are given in Å. (Colour of atoms: grey-C, pink-H, blue-N and sky blue-lithium)

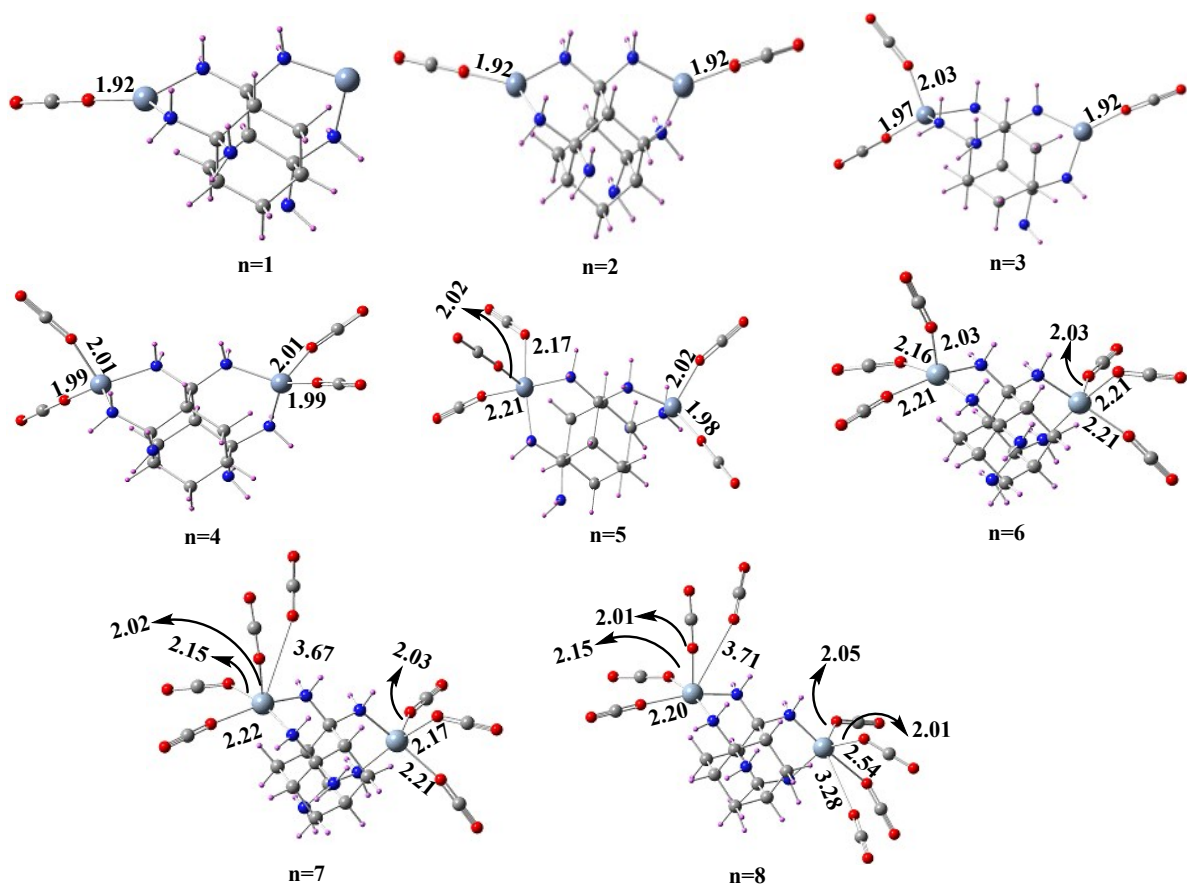

**Figure S2:** Optimized geometries of sequential adsorption of CO<sub>2</sub> molecules ( $n=1-8$ ) with lithiated adamantane **8** at M06-2X/6-31+G(d) level of theory. Distances are given in Å. (Colour of atoms: grey-C, pink-H, blue-N and sky blue-lithium, red-oxygen)

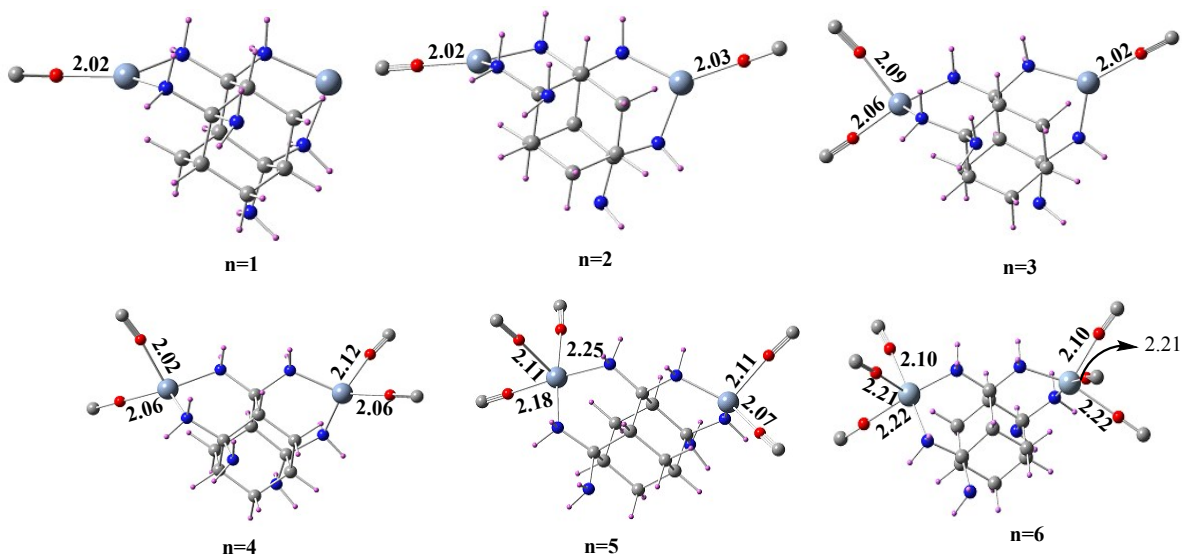

**Figure S3:** Optimized geometries of sequential adsorption of CO molecules ( $n=1-6$ ) with lithiated adamantane **8** at M06-2X/6-31+G(d) level of theory. Distances are given in Å. (Colour of atoms: grey-C, pink-H, blue-N and sky blue-lithium, red-oxygen)
